# Supplementary material for: Multiple Haplotype Reconstruction from Allele Frequency Data
Source: bioRxiv or medRxiv preprint supplement (doi:10.1101/2020.07.09.191924), 2020-12-10
Supplement: Supplementary file [file media-1.pdf]

# Multiple Haplotype Reconstruction from Allele Frequency Data

Supplementary Material

Marta Pelizzola<sup>1,2,a</sup>, Merle Behr<sup>3,a</sup>, Housen Li<sup>4</sup>, Axel Munk<sup>4,5</sup>, Andreas Futschik<sup>6, b</sup>

1 Vetmeduni Vienna

2 Vienna Graduate School of Population Genetics

3 University of California Berkeley

4 University of Göttingen

5 Max Planck Institute for Biophysical Chemistry, Göttingen

6 Johannes Kepler University Linz

a These authors contributed equally

b Corresponding author, andreas.futschik@jku.at

Our supplementary material is structured as follows. We first provide additional information on our proposed method in Section S2. In particular, we discuss conditions that ensure identifiability, i.e. unique estimates for our underlying haplotypes and their frequencies. We also provide algorithms and explain how we select the number of haplotypes (model selection), and how accuracy scores are computed that provide information on the quality of the estimates.

In Section S3, we describe our model for the simulations. We provide additional results from our simulations, together with our analysis of the error under several experimental designs, in Section S4. We evaluate the accuracy measure introduced in Section S2-5 with our simulations in Section S5. Furthermore, additional results on the estimation of allele frequencies are provided in Section S6. Section S7 provide an analysis of the simulation runs leading to outliers in the reconstruction error and Section S8 discusses the effects of different levels of recombination on our proposed approach. Additional results on the real data can be found in Sections S9, S10, and S11, S12. Lastly, Section S13 presents further details and results on the comparison with other methods.

## S1 Definitions and Notation

- **Box-plots:** For boxplots, the lower and upper hinges correspond to the first and third quartiles. The whiskers extend to  $1.5 \times \text{IQR}$  from the hinges (where IQR is the inter-quartile range). The same applies to all boxplots in the manuscript.
- **Haplotype structure accuracy:** The accuracy for the haplotype structure is computed as the proportion of mismatches between true and estimated haplotype structures.
- **Haplotype frequency accuracy:** The accuracy for the haplotype frequency is computed as the absolute value of the difference between true and estimated frequency for each haplotype at each time point.
- **Allele frequency accuracy:** The accuracy in allele frequency ( $\alpha$ ) is computed per sample as  $\alpha = \frac{\frac{1}{N} \sum_{i=1}^N |y_i - \hat{y}_i^{\text{haplotypes}}|}{\frac{1}{N} \sum_{i=1}^N |y_i - \hat{y}_i^{\text{pool}}|}$  where  $N$  is the number of SNPs,  $y_i$  is the true allele frequency of SNP  $i$ ,  $\hat{y}_i^{\text{haplotypes}}$  is the allele frequency of SNP  $i$  estimated using the reconstructed haplotypes, and  $\hat{y}_i^{\text{pool}}$  is the one estimated by pool sequencing.
- **Most frequent haplotype:** Haplotype having the highest sum of the frequency over all samples.

- 43 • **Best matching haplotype:** True haplotype having the most similar structure to a given  
44 reconstructed haplotype.
- 45 • **Haplotype frequency accuracy intervals:** The accuracy intervals for haplotype fre-  
46 quencies are the 0.025 and 0.975 quantiles of  $\hat{W}_{it}(Y^*)$  as detailed in S2-5.

## 47 S2 Theory and Methods

### 48 S2-1 Identifiability of structure and frequency from allele frequency 49 (AF)

[Behr and Munk, 2017] derived sufficient and necessary conditions under which the matrices  $S$  and  $W$  (including the number of haplotypes  $m$ ) are uniquely identifiable from their product  $SW$ . With some slight modifications of their arguments, we can also show that under weak identifiability assumptions on  $S$  and  $W$ , one can uniquely identify  $S$ ,  $W$ , and  $b$  from the population AFs  $F$ . More precisely, for  $W$  it is assumed that different combinations of SNPs lead to different AFs, that is,

$$sW \neq s'W \text{ for all } s \neq s' \in \{0, 1\}^m. \quad (\text{S1})$$

For the haplotype structure  $S$  it is assumed that there is at least one SNP which is unique to a haplotype and at least one SNP that is only present in minor haplotypes, that is

$$\text{for all } i \in [m] \text{ there exists an } n \in [N] \text{ such that} \\ S_{ni} = 1 \text{ and } S_{nj} = 0 \text{ for all } j \neq i \quad (\text{S2})$$

and there exists an  $n \in [N]$  such that  $S_{ni} = 0$  for all  $i \in [m]$ ,

50 (equivalently one can exchange 0 and 1 in (S2)). Both of these conditions are very reason-  
51 able in most real data situations, given that the number of essential haplotypes  $m$  is not too  
52 large. It is easy to see that condition S1 is necessary for identifiability of haplotype struc-  
53 ture  $S$  and frequency  $W$  from AF  $Y$  in (2). A simple situation, where S1 does not hold is  
54 when two haplotypes have exactly the same proportion at all time points  $t \in [T]$ . In that  
55 case, it is not possible to distinguish whether a SNP is present in one or the other haplo-  
56 type. Condition (S2) imposes a sufficient variability of individual haplotypes. A trivial non-  
57 identifiable counter example is, for instance, when one major haplotype is constant zero or  
58 constant one. Some further insights and examples on the specific condition in (S2) can be  
59 found in [Behr and Munk, 2017, Behr et al., 2018]. Note that (S2) requires that out of the  
60  $2^m$  possible variant combinations for the  $m$  haplotypes, at least those  $m$  combinations which  
61 correspond to the identity vectors  $e_1 = (1, 0, \dots, 0), \dots, e_m = (0, \dots, 0, 1)$  and the one which  
62 corresponds to the zero vector  $(0, \dots, 0)$  appear at some of the locations  $n \in [N]$ .

63 The conditions (S1) and (S2) do not just guarantee identifiability in an abstract way, but  
64 they also lead to an explicit algorithm for recovering  $S$ ,  $W$ ,  $b$  and  $m$  from the noiseless AFs  
65  $SW + b$  in (2). Part of our reconstruction algorithm is built on this deterministic recov-  
66 ery algorithm that is based on a simple combinatorial reordering of the observations (see  
67 [Behr and Munk, 2017, Diamantaras and Chassioti, 2000] for very similar algorithms). The  
68 idea of this algorithm is that the discrete nature of  $S$  lets us identify both  $S$  and  $W$  from  
69 appropriate row vectors of  $Y$  as outlined in the following.

70 The smallest norm among the rows of  $Y$  appears for any SNP that has variant 0 for all  
71  $m$  haplotypes, in which case we observe only the bias term  $b$ . Similar, the second (and third)  
72 smallest possible row value of  $Y$  appears for a SNP with variant 0 on all haplotypes, except  
73 the one with the smallest frequency  $W_m$ . (second smallest frequency  $W_{(m-1)}$ ), which lets us

74 identify  $W_m$  and  $W_{(m-1)}$ . Among the remaining observed row values of  $Y$  the smallest one  
75 must correspond to  $W_{(m-2)}$ , and so on. In that way, one can successively recover all the  
76 frequencies  $W_i$  and given  $W$  it is straightforward to recover  $S$ . We present pseudo code in  
77 Algorithm 1 below.

78 **S2-2 Algorithms**

79

---

**Algorithm 1** Recover  $S, W, b$  from exact data  $Y = SW + b$

---

1: **procedure** HAPLOSEPCOMBIEXACT

**Input:**  $Y = SW + \mathbf{1}b^\top$  such that (S1) and (S2) hold.

**Output:**  $S, W, b, m$

2:  $\mathcal{Y} \leftarrow \{Y_{1\cdot}, \dots, Y_{N\cdot}\}$

3:  $b \leftarrow \arg \min_{y \in \mathcal{Y}} \|y\|$

4:  $\mathcal{Y} \leftarrow \mathcal{Y} \setminus b$

5:  $\mathcal{Y} \leftarrow \mathcal{Y} - b$

6:  $W_{1\cdot} \leftarrow \arg \min_{y \in \mathcal{Y}} \|y\|$

7:  $\mathcal{Y} = \mathcal{Y} \setminus W_{1\cdot}$ .

8:  $m \leftarrow 1$

9: **while**  $\mathcal{Y} \neq \emptyset$  **do**

10:      $W_{(m+1)\cdot} \leftarrow \arg \min_{y \in \mathcal{Y}} \|y\|$

11:      $m \leftarrow m + 1$

12:      $\mathcal{Y} \leftarrow \mathcal{Y} \setminus \{\sum_{i=1}^m s_i W_{i\cdot} : s \in \{0, 1\}^m\}$

13: **end while**

14: **for**  $n = 1$  to  $N$  **do**

15:      $S_{ni} \leftarrow \arg \min_{s \in \{0, 1\}^m} \|Y_{n\cdot} - sW\|$

16: **end for**

17:     put  $W_i$  in the reverse order

18:     **return**  $S, W, b, m$

19: **end procedure**

---

80

81

82

---

**Algorithm 2** Initialize  $\hat{W}, \hat{b}$  from  $Y$  in (2)

---

1: **procedure** HAPLOSEPCOMBI

**Input:**  $Y \in [0, 1]^{N \times T}$  and  $m \in [N]$

**Output:**  $\hat{W}, \hat{b}$

2:  $\{C_1, \dots, C_{2^m}\} \leftarrow$  hierarchical clustering of  $\{Y_{n\cdot} : n \in [N]\}$  with  $2^m$  centers  $\subset [0, 1]^T$ .

3:  $\hat{C} \leftarrow \{C_1, \dots, C_{2^m}\}$

4:  $\hat{b} \leftarrow \arg \min_{c \in \hat{C}} \|c\|$

5:  $\hat{C} \leftarrow \hat{C} \setminus \hat{b}$

6:  $\hat{C} \leftarrow \hat{C} - \hat{b}$

7:  $\hat{W}_1 \leftarrow \arg \min_{c \in \hat{C}} \|c\|$

8:  $\hat{C} \leftarrow \hat{C} \setminus \hat{W}_1$ .

9: **for**  $l = 2$  to  $m$  **do**

10:      $\hat{W}_l \leftarrow \arg \min_{c \in \hat{C}} \|c\|$

11:     **for**  $s \in \{0, 1\}^{l-1}$  **do**

12:          $\hat{C} \leftarrow \hat{C} \setminus \{\arg \min_{c \in \hat{C}} \|c - \sum_{i=1}^{l-1} s_i \hat{W}_i - \hat{W}_l\|\}$

13:     **end for**

14: **end for**

15: **return**  $\hat{W}, \hat{b}$

16: **end procedure**

---



---

**Algorithm 3** Recover  $S, W, b$  from  $Y$  in (2)

---

1: **procedure** HAPLOSEP

**Input:**  $Y \in [0, 1]^{N \times T}, m \in [N], \delta > 0$

**Output:**  $\hat{W}, \hat{b}, \hat{S}$

2:  $(\hat{W}, \hat{b}) \leftarrow$  HAPLOSEPCOMBI( $Y, m$ )

3: **for**  $n = 1$  to  $N$  **do**

4:      $\hat{S}_n \leftarrow \arg \min_{s \in \{0, 1\}^m} \|Y_{n\cdot} - s\hat{W} - \mathbf{1}\hat{b}^\top\|$

5: **end for**

6:  $E_0 \leftarrow 0$

7:  $E_n \leftarrow \|Y - \hat{S}\hat{W} - \mathbf{1}\hat{b}^\top\|$

8: **while**  $|E_n - E_0| > \delta$  **do**

9:      $E_0 \leftarrow E_n$

10:      $(\hat{W}, \hat{b}) \leftarrow \arg \min_{W, b} \|Y - \hat{S}W - \mathbf{1}b^\top\|$

11:     such that  $W_{it}, b_t \in [0, 1], \sum_{i=1}^m W_{it} \leq 1$

12:     **for**  $n = 1$  to  $N$  **do**

13:          $\hat{S}_n \leftarrow \arg \min_{s \in \{0, 1\}^m} \|Y_{n\cdot} - s\hat{W} - \mathbf{1}\hat{b}^\top\|$

14:     **end for**

15:      $E_n \leftarrow \|Y - \hat{S}\hat{W} - \mathbf{1}\hat{b}^\top\|$

16: **end while**

17: **return**  $\hat{W}, \hat{b}, \hat{S}$

18: **end procedure**

---

### 84 S2-3 Computational aspects of haploSep

85 In the following we provide more details on computational aspects of the `haploSep` procedure.  
 86 Recall that `haploSep` takes as input a matrix  $Y \in [0, 1]^{N \times T}$  with allele frequency data, as  
 87 well as an integer  $m$ , which gives the number of estimated haplotypes. From a computational  
 88 perspective, the relevant regime for haplotype reconstruction is when  $N$  is large (typically larger  
 89 than 100),  $T$  is of small or moderate size (typically smaller than 100) and  $m$  is small (typically  
 90 around 2–8). In the following, we consider each of the different steps in the `haploSep` procedure  
 91 separately and analyze computational aspects.

- 92 1. **(Clustering)** In the `haploSepCombi` initialization algorithm, see Algorithm 2, the first  
 93 step is to cluster the  $N$  rows of the matrix  $Y$  into  $2^m$  groups. To this end, we employed  
 94 hierarchical clustering via the R function `hclust` from the R package `stats` with Euclidean  
 95 distance metric. The complexity to compute the distance matrix between the  $N$   
 96 different rows, each of dimension  $T$ , is  $\mathcal{O}(N^2T)$ . For the whole `haploSep` procedure, this  
 97 is the only part which has a quadratic dependence on the number of sample  $N$  (all other  
 98 steps are linear in  $N$ ) and hence, for a typical sample size regime in haplotype separation,  
 99 this part is the computational bottleneck of the current implementation. Nevertheless,  
 100 for all the scenarios considered in this paper, the overall computation time of `haploSep`  
 101 never took longer than a few seconds on a standard laptop. If needed, however, one may  
 102 replace hierarchical clustering with a computationally faster algorithm, as, e.g., k-means,  
 103 in which case the overall computational complexity of `haploSep` will be linear in the  
 104 number of variants  $N$ .
- 105 2. **(Combinatorial Initialization)** Given the  $2^m$  cluster centers, each of dimension  $T$ , from  
 106 the previous step, `haploSepCombi` as in Algorithm 2 then reconstructs an estimate for the  
 107 haplotype frequency  $\hat{W}$  and the bias term  $\hat{b}$ . Note that  $2^m \ll N$ . Thus, the computation  
 108 time of this part is completely independent of  $N$  and therefore typically negligible. More  
 109 precisely, computation time of this part is of order  $\mathcal{O}(2^{2m}T)$ .
- 110 3. **(Lloyd’s-type Iteration)** Given the initialization  $(\hat{W}, \hat{b})$  from the previous step,  
 111 `haploSep` (see Algorithm 3) then iteratively updates  $(\hat{W}, \hat{b})$  and  $\hat{S}$  until convergence. An  
 112 individual update step of  $\hat{S}$  amounts to comparing the distances of the  $N$  rows of  $Y$  to  
 113 the current  $2^m$  centers as in (4), each of dimension  $T$ , and thus, has computation time  
 114  $\mathcal{O}(2^mNT)$ . An individual update step of  $(\hat{W}, \hat{b})$  amounts to linear regression (with convex  
 115 constraints), which has a linear worst case computational complexity w.r.t. the number  
 116 of sample  $N$  (as well as a linear computational complexity w.r.t. the number of time  
 117 points  $T$ ). To solve this part efficiently, we use the `lse1` function from the R package  
 118 `limSolve`. Note that both update steps of  $\hat{S}$  and of  $(\hat{W}, \hat{b})$  result in a monotone decrease  
 119 of the overall  $L^2$  error,  $\|Y - \hat{S}\hat{W} - \mathbf{1}b^\top\| \geq 0$  and therefore, will converge eventually. In  
 120 practice, we found that `haploSep` usually converges within a couple of iterations, and for  
 121 any stopping threshold  $\delta \leq 0.001$  (in our simulations we chose  $\delta = 0.001$ ) results were  
 122 almost completely independent of the choice of  $\delta$ . We provide a detailed simulation study  
 123 which illustrates this below.

124 In summary, `haploSep` is computationally very efficient, with a linear computational complexity  
 125 in the number of SNP locations  $N$  (up to, potentially, the initial clustering step). In the  
 126 following we illustrate these computational aspects with simulation examples, which were all  
 127 performed on a standard laptop with Intel Core i7 processor.

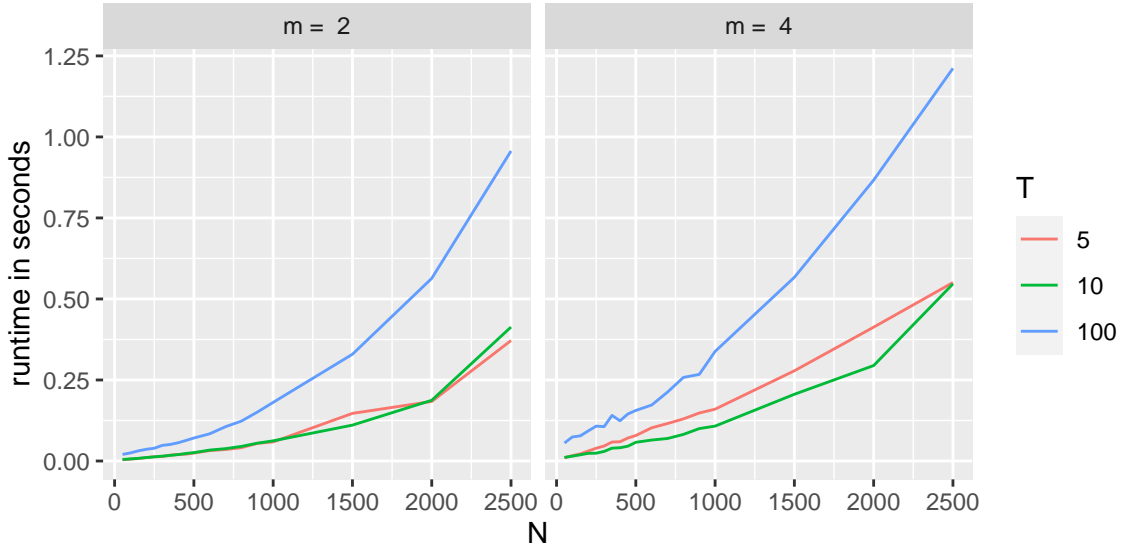

Figure S1: Runtime analysis for `haploSep`. Runtime (y-axis) against number of SNPs  $N$ , for different values of number of generations  $T$  (see legend for color code), and number of reconstructed haplotypes  $m$  (left:  $m = 2$  and right:  $m = 4$ ). Results are averaged over 100 Monte Carlo runs. See text for details of simulation setup. As can be seen, even for a large number of generations  $M$  (e.g.,  $M = 100$ ) and a large number of variants (e.g.,  $N = 2500$ ), `haploSep` has a runtime of only a few seconds.

128 For different values of  $N, T$ , and  $m$  we evaluated the run time of `haploSep`. To this end,  
 129 we randomly generated an  $N \times m$  binary matrix as a haplotype structure and then applied the  
 130 function `haploSimulate` from our R package `haploSep` to simulate an allele frequency matrix  
 131  $Y \in [0, 1]^{N \times T}$  with effective population size equal to 300, at generations  $0, 10, 20, \dots, 10 \cdot (T - 1)$ ,  
 132 and with mean sequencing coverage of 80. We took the average over 100 Monte Carlo runs.  
 133 Results are shown in Fig. S1. As can be seen, even for as many as 100 generations and 2500  
 134 variants, `haploSep`'s runtime, e.g., for 4 haplotypes, is just a little bit over a second, which  
 135 shows that computation time will almost never be problematic for real data applications in a  
 136 typical sample size regime.

137 Moreover, we evaluated the number of iterations that `haploSep` performs update steps of  
 138  $(\hat{W}, \hat{b})$  and  $\hat{S}$ , respectively, for different values of stopping thresholds  $\delta$ . As an example, we  
 139 considered  $N = 500, m = 3, T = 10$ , with  $Y$  generated in the same way as for the previous sim-  
 140 ulations. Fig. S2 shows the average number of iterations (y-axis) for  $\delta = 10^{-2}, 10^{-3}, \dots, 10^{-10}$   
 141 (x-axis) over 1,000 Monte Carlo runs, with standard deviation shown as error bars. As can  
 142 be seen, on average `haploSep` performs between 2 and 3 iterations, even when  $\delta$  is as small as  
 143  $10^{-10}$ .

144 To further illustrate robustness with respect to the  $\delta$  parameter, we compared the recon-  
 145 structed  $\hat{W}$  and  $\hat{S}$  for different values of  $\delta$ . More precisely, we considered the same simulation  
 146 setup as before and let  $\hat{W}^i, \hat{S}^i$ , for  $i = 1, 2$  be the reconstruction for  $\delta_1 = 10^{-3}$  (which is the  
 147 default value for our simulations) and  $\delta_2 = 10^{-6}$ . Fig. S3 shows the mean absolute deviation  
 148  $|\hat{W}_{ij}^1 - \hat{W}_{ij}^2|$  (left) and  $|\hat{S}_{ni}^1 - \hat{S}_{ni}^2|$  (right) averaged over  $i = 1, \dots, 3, j = 1, \dots, 10, n = 1, \dots, 500$ ,  
 149 and 1,000 Monte Carlo runs with  $Y$  as in the previous setup. As can be seen, the difference  
 150 between  $(\hat{W}^1, \hat{S}^1)$  and  $(\hat{W}^2, \hat{S}^2)$  is negligible, and hence, we conclude that the choice of  $\delta$  is not  
 151 of major concern.

152

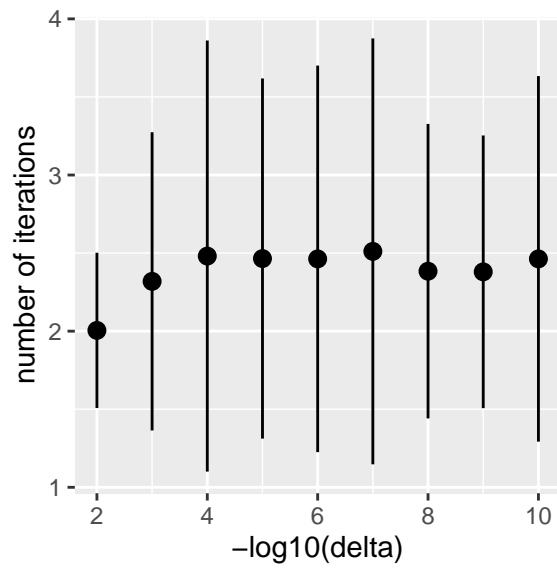

Figure S2: Simulation analysis for the number of iterations that the `haploSep` procedure requires for the Lloyd's-type update setps. Number of iterations (y-axis) for  $-\log_{10}(\delta) = 2, 3, \dots, 10$  (x-axis) averaged over 1,000 Monte Carlo simulations, with standard deviation shown as error bars. See text for details of simulation setup. As can be seen, `haploSep` typically converges after a few iterations.



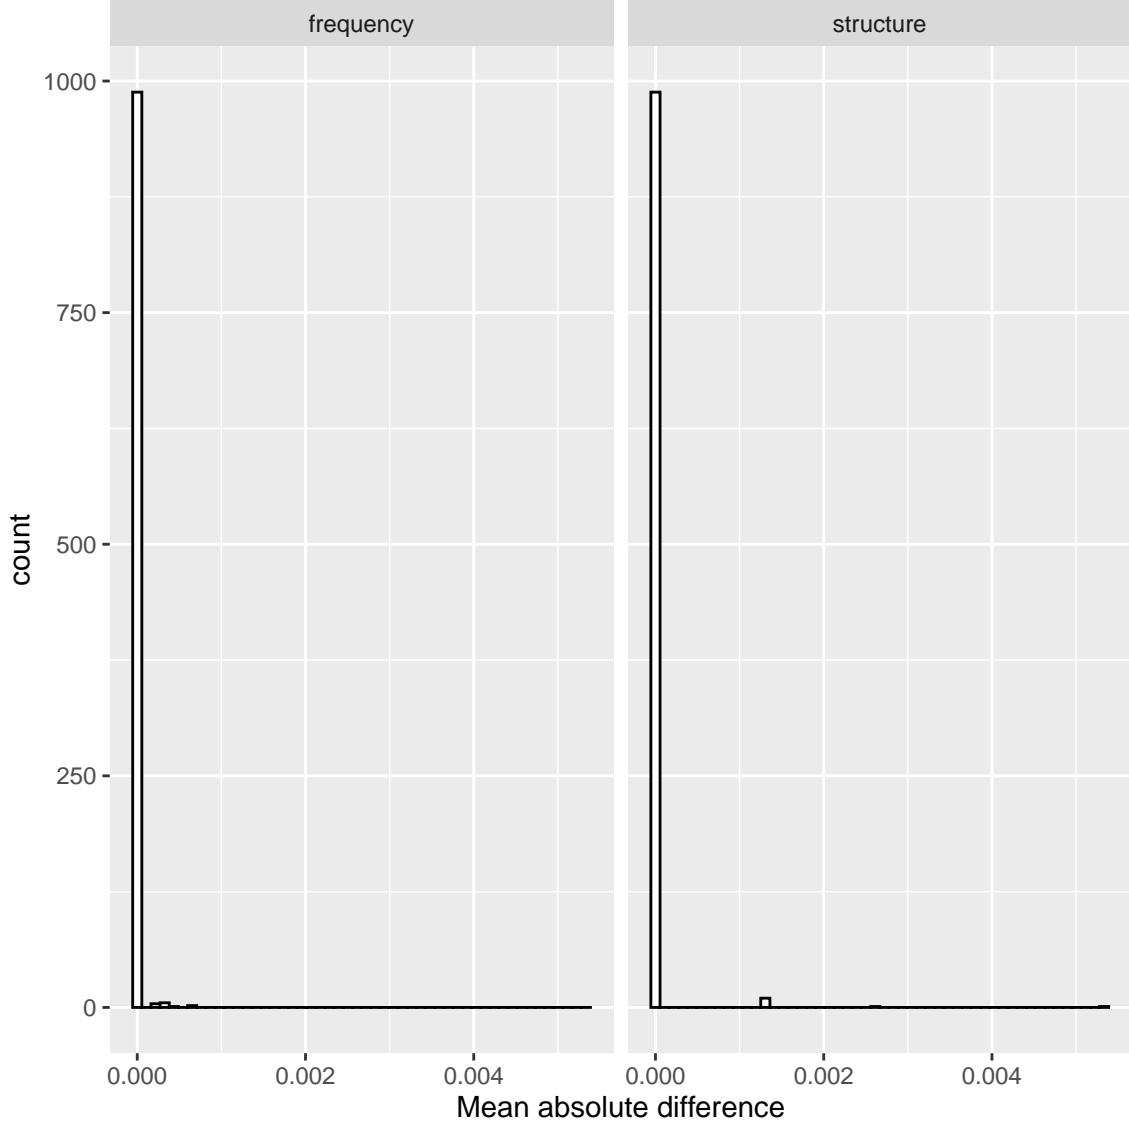

Figure S3: Simulation analysis for the difference in `haploSep`'s reconstruction of  $S$  and  $W$  for different values of the threshold parameter  $\delta$ . Histogram of absolute difference of reconstructed frequency matrices,  $|\hat{W}_{ij}^1 - \hat{W}_{ij}^2|$ , (left) and haplotype structure,  $|\hat{S}_{ni}^1 - \hat{S}_{ni}^2|$ , (right) over  $i = 1, \dots, 3$ ,  $j = 1, \dots, 10$ ,  $n = 1, \dots, 500$ , and 1,000 Monte Carlo runs with  $Y$  as described in the main text. Here,  $\hat{W}^i, \hat{S}^i$ , for  $i = 1, 2$ , denotes the reconstruction with threshold value  $\delta_1 = 10^{-3}$  (which is our default value) and  $\delta_2 = 10^{-6}$ , respectively.

## 154 S2-4 Model selection via SVD

Note that in the noiseless population case ( $Y = SW + b$  in (2)) the number of dominant haplotypes  $m$  can directly be obtained via the rank of the AF matrix with

$$\text{rank}(SW + \mathbf{1}b^\top) = m + 1. \quad (\text{S3})$$

To see this, note that the  $t$ th column of  $SW + b$  can be written as

$$\sum_{i=1}^m S_{.i}W_{it} + b_t(1, \dots, 1)^\top$$

and thus

$$\text{rank}(SW + \mathbf{1}b^\top) = \dim(\text{span}(S_{.1}, \dots, S_{.m}, (1, \dots, 1)^\top)) = m + 1,$$

where the last equality follows from the identifiability condition (S2). Thus, estimation of  $m$  from  $Y$  corresponds to estimating the (low) rank of the matrix  $SW + b$  from its noisy version  $Y$ . A more general strategy for the noisy case is to consider the singular values  $s_1, \dots, s_T$  of  $Y$  (assuming that  $N \geq T$ ) and then estimate

$$\hat{m} + 1 = \#\{s_i \geq \tau : i \in [\min(N, T)]\} \quad (\text{S4})$$

for some threshold  $\tau$ . [Gavish and Donoho, 2014] derived optimal thresholds (in terms of matrix denoising) that are approximately

$$\tau \approx (0.5(T/N)^3 - 0.95(T/N)^2 + 1.82(T/N) + 1.43) s_{\text{med}}, \quad (\text{S5})$$

155 where  $s_{\text{med}}$  denotes the median of the singular values  $s_1, \dots, s_T$  of  $Y$ . In summary, we estimate  
156  $\hat{m}$  as in (S4) with  $\tau$  as in (S5).

## 157 S2-5 Accuracy scores

In practice, it may happen that our modeling assumption of a small number of major haplotypes  $m \ll T, N$  is violated, e.g., because only few haplotypes are lost over time under some neutral scenario without selection. Alternatively, the selected haplotypes may get lost early on due to random genetic drift. In such a case, a low dimensional haplotype representation will often yield a poor fit to the data  $Y$ , which we measure using the well known coefficient of determination  $R^2 = 1 - \frac{\|Y - \hat{S}\hat{W} - \mathbf{1}\hat{b}^\top\|^2}{\|Y - \bar{Y}\|^2}$ . Besides  $R^2$ , we also report the uncertainty of the proposed estimates via bootstrap confidence scores and bands [Efron, 1979]. Recall that the haplotype structure  $S$  is constant over the time points  $t \in [T]$ . Thus, in order to evaluate uncertainty in the estimate  $\hat{S}$ , we propose to resample (with replacement) from the empirical distribution on  $\{Y_{.1}, \dots, Y_{.T}\}$ , that is,

$$Y_t^* \stackrel{\text{i.i.d.}}{\sim} \frac{1}{T} \sum_{t=1}^T 1_{Y_t}, \quad (\text{S6})$$

where  $1_y$  denotes the dirac measure on  $y$ . For each haplotype  $i \in [m]$  and SNP location  $n \in [N]$  via sampling  $Y^* = (Y_1^*, \dots, Y_T^*)$  from (S6), we compute the variance of  $\hat{S}_{ni}(Y^*)$ . As stability score for the  $i$ th haplotype estimate we report the following score:

$$\text{StabScoreS}_i = 1 - \frac{1}{N} \sum_{n=1}^N |\hat{S}_{ni} - \frac{1}{K} \sum_{k=1}^K \hat{S}_{kni}| \in [0, 1]. \quad (\text{S7})$$

158 A stability score of  $\text{StabScoreS}_i = 1$  suggests an unbiased estimate of the  $i$ th haplotype  
 159 and stability score of  $\text{StabScoreS}_i = 0$  a highly biased estimate, which may occur due to  
 160 model misspecification (i.e., violation of the major haplotype assumption or the identifiability  
 161 conditons).

For the haplotype frequencies  $W$ , we observe that they are invariant for different locations  
 $n \in [N]$ . Thus, to evaluate uncertainty for  $W$  we resample from

$$Y_n^* \stackrel{\text{i.i.d.}}{\sim} \frac{1}{N} \sum_{n=1}^N 1_{Y_n}. \quad (\text{S8})$$

162 We report the 0.025 and 0.975 quantiles of  $\hat{W}_{it}(Y^*)$  as bootstrap confidence bands and the  
 163 average width of those confidence bands as stability scores.

164 In practice, we found the above scores to perform reasonable, but we clearly note that there  
 165 are many other possibilities to construct quality scores for our setting, such as other bootstrap  
 166 based scores, or also Bayesian credible scores, or frequentist p-values that are based on explicit  
 167 modeling assumptions, potentially conditioning on either  $\hat{W}$  or  $\hat{S}$  to construct conditional  
 168 confidence statements for the other.

169 We determine a criterion for accepting scenarios where the reconstruction has enough ac-  
 170 curacy overall and consider the structure and frequency specific accuracy scores only for those  
 171 scenarios. Our criterion is based on the  $R^2$  scores and the frequency change of the haplotype  
 172 reaching highest frequency. More specifically, we require  $R^2 > 0.8$  and the frequency change of  
 173 the haplotype reaching highest frequency  $> 0.1$ .

## 174 S3 Simulation setup

175 We evaluate our approach using extensive simulations. In our simulations we considered three  
 176 experimental designs aiming to reproduce the three data sets we analyze in Section 4, i.e. the ex-  
 177 periments explained in [Noble et al., 2019], [Castro et al., 2019] and [Barghi et al., 2019]. They  
 178 cover three very different organisms used in E&R experiments (*Caenorhabditis elegans*, mice,  
 179 and *Drosophila simulans*) with various complexities leading to three different starting condi-  
 180 tions for the experiments. Indeed, mice populations need to be small because of the mainte-  
 181 nance effort involved, whereas this is not the case for *Drosophila simulans* and even less for  
 182 *Caenorhabditis elegans*. The latter two organisms thus give more freedom to choose the number  
 183 of different starting haplotypes.

184 Selection is an important factor in E&R experiments where researchers attempt to under-  
 185 stand the genetic architecture of adaptation. In the literature, several E&R experiments have  
 186 been discussed that involve different stressful conditions. Sources of stress can be high/low-  
 187 quality food, body size constraints (e.g. only sufficiently small or large organisms are allowed  
 188 to reproduce), or heat. Our three data sets consider stress conditions on the reproduction  
 189 regime [Noble et al., 2019], on the body size [Castro et al., 2019] and the temperature regime  
 190 [Barghi et al., 2019]. Other publications focus on desiccation resistance [Griffin et al., 2017],  
 191 pathogen resistance [Kraaijeveld and Godfray, 2008], and selection on flying speed  
 192 [Weber, 1996].

193 In our simulations, we consider starting populations with the same numbers of haplotypes,  
 194 and of individuals, as in the real data applications discussed in Section 4. As some of the  
 195 founder haplotypes from [Barghi et al., 2019] were made available to us by the authors, starting  
 196 populations were obtained by sampling from these haplotypes. For our basic scenario, we  
 197 introduce a simple selection regime with selection strength  $s = 0.05$  for a beneficial allele present  
 198 at three different founder haplotypes. The genetic composition of generation  $n$  is obtained by  
 199 multinomial sampling from the previous generation. Sequencing data are generated every tenth

200 generation at 16 different time points ( $G_0, G_{10}, \dots, G_{150}$ ). From the simulated haplotype data,  
201 we compute the true allele frequencies via the regression model  $Y = SW$  in Section 2 of the  
202 main text as the matrix product of the simulated haplotype structure and frequency. Afterward,  
203 we simulate observed allele frequencies using binomial sampling with sample size  $n$  equal to the  
204 local sequencing coverage, taken from a Poisson(80) distribution. This is to mimic that real  
205 allele frequency data in most E&R experiments are noisy because individuals are sequenced as  
206 a pool with a given depth (coverage) that changes according to the available resources. With  
207 pool sequencing the DNA of all organisms is mixed and sequenced together. An extensive  
208 explanation of pool sequencing can be found in [Schlötterer et al., 2014]. A detailed description  
209 of this binomial sampling step can be found in [Waples, 1989] and [Jónás et al., 2016].

210 Beyond our basic scenario, we also investigate several alternative scenarios, and consider  
211 how design parameters of E&R experiments affect the quality of our haplotype reconstruction.  
212 Parameter values not mentioned in our results have been chosen as in our basic scenario.

## 213 S4 Simulation results

214 Complementing Section 3.1, we provide results for our three simple selection scenarios on the comparison between the reconstructed and the true haplotype structure in Fig. S4.

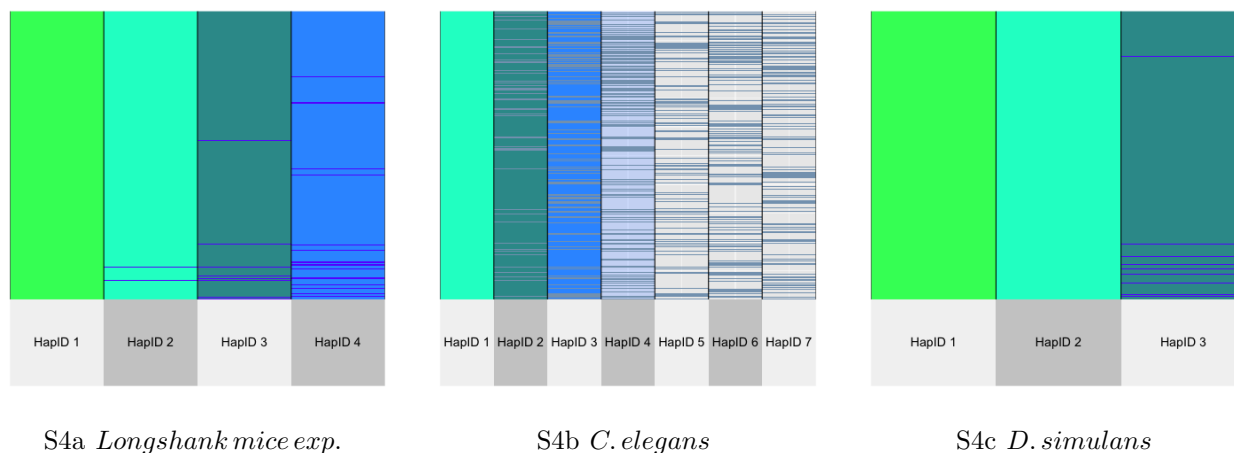

Figure S4: Result of one simulation run from the simple selection scenario with the experimental design from the Longshank mice experiment (a), *C. elegans* (b), and *Drosophila simulans* (c). This figure shows inconsistencies between true and reconstructed haplotype structure. Blue line indicates mismatches.

215 Most of the mismatches that we observe in Fig. S4 are in the low-frequency haplotypes.  
 216 In order to reconstruct haplotypes correctly, they need to be present in the population at  
 217 an appreciable frequency for several generations. In particular our approach usually cannot  
 218 accurately reconstruct the structure of haplotypes reaching zero frequency in the earlier part  
 219 of the experiment. Even so, those haplotypes are not of interest for most analyses trying to  
 220 understand the architecture of adaptation because they do not provide any contribution to it.  
 221 Since the number of true haplotypes can be much larger than the number of haplotypes we  
 222 reconstruct, we match the (true) haplotype having the closest possible structure to the given  
 223 reconstructed one to compute the error for our estimated haplotypes. As for the figures in  
 224 the main text, we filter again using our criteria on  $R^2$  and the frequency change of the most  
 225 abundant haplotype as explained in Section S2-5. See Section S7 for the remaining simulation  
 226 runs. Based on 100 simulation runs, Fig. S5 shows very low error for both frequency and  
 227 structure of the selected haplotype(s). However, looking at the different time points, the error  
 228 is higher for initial generations, whereas it drops for later stages of evolution (see Fig. S5b).  
 229 The differences between earlier and later time points can be pronounced depending on the  
 230 experimental design. Indeed when selection occurs, our method provides better estimates for  
 231 later time points than for earlier ones, if the number of reconstructed haplotypes is much smaller  
 232 than the number of haplotypes in the starting population. Similar conclusions can be drawn  
 233 also for the results about the experimental design based on [Noble et al., 2019], shown in Fig.  
 234 S6.  
 235

236 Starting from these three simple selection scenarios, we did simulations for different values of  
 237 important parameters for E&R in order to assess how they affect our haplotype reconstruction.  
 238 We focus on the selection coefficient, the number of haplotypes in the founder population, the  
 239 number of haplotypes carrying the beneficial allele, the coverage and the number of time points  
 240 where the sequencing data are collected. For each simulation run the number of haplotypes  
 241 being reconstructed is estimated via our model selection step as explained in Section S2-4. All  
 242 the results discussed in this section are simulated with the parameters introduced in Section S3

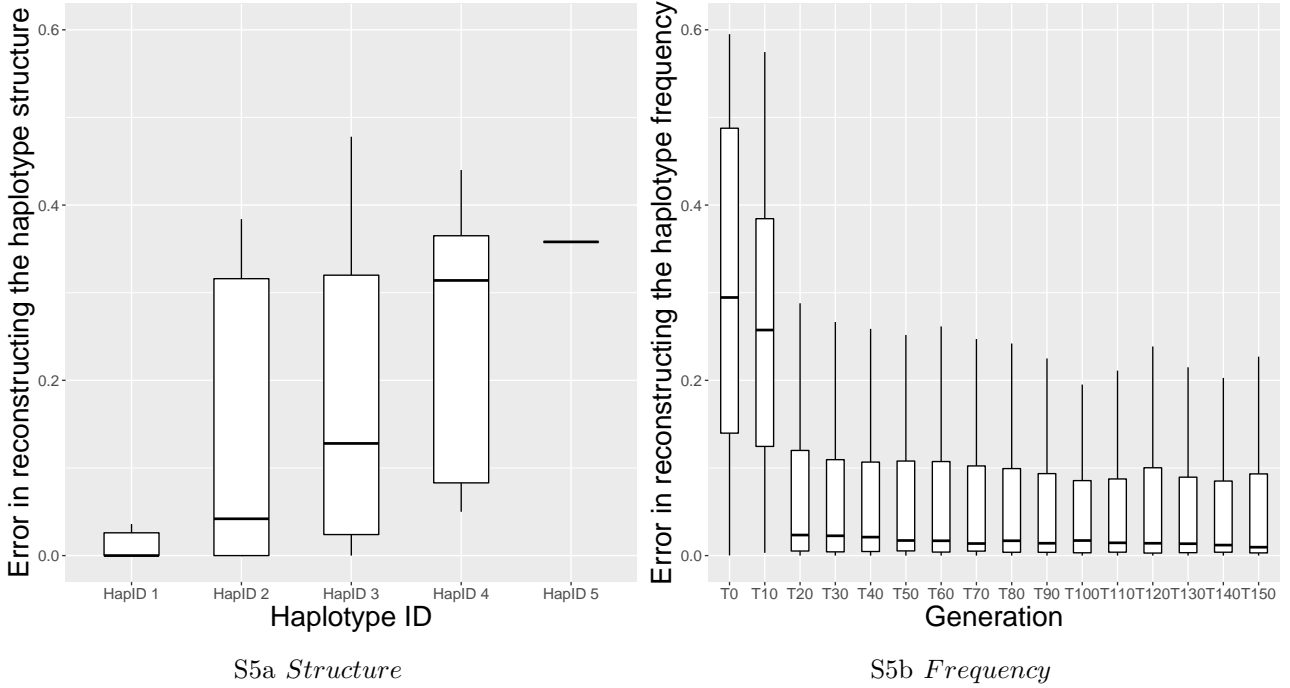

Figure S5: Haplotype reconstruction error for our basic selection scenario with *Drosophila simulans* based on 100 simulation runs. (a) Proportion of wrongly classified SNPs for each reconstructed haplotype. The haplotypes are displayed in decreasing order according to their cumulative frequency over time. (b) Absolute difference between the true and estimated haplotype frequencies for each time point at which sequencing information is available.

243 ( $s = 0.05$ , 150 generations of E&R where allele frequencies are available every 10 generations,  
 244 one locus carries the beneficial allele in three individual haplotypes, genotypes from the founder  
 245 population used in [Barghi et al., 2019]). Fig. S7 shows the accuracy depending on the selec-  
 246 tion pressure. As we expect, the error decreases when the selection pressure increases. We can  
 247 observe that the effect is very pronounced for the experimental designs with large population  
 248 size. This is because the reconstruction results become more and more accurate as the changes  
 249 in haplotype frequency throughout time increase. When the populations size is small (e.g. in  
 250 experiments using bigger organisms like mice), these haplotype frequency changes can occur  
 251 under neutrality as well.

252 Our method requires information from multiple sources, which for E&R experiments corre-  
 253 spond to sequenced time points. The number of time points at which the sequencing data are  
 254 available mainly depends on the time and costs allocated to the experiment. As it is shown  
 255 in the lower panel of Fig. S8 (and with a less pronounced effect in the upper panel), four time  
 256 points do not contain enough information for any experimental design to obtain satisfactory  
 257 results. However when the number of time points increases the error drops and this is consistent  
 258 for all three experimental designs as well. It is also important to notice that the number of  
 259 haplotypes we can reconstruct is smaller or equal to the number of available time points. This  
 260 can also influence the power of our method under certain experimental designs where a high  
 261 number of haplotypes is needed to capture the true dynamic of the haplotype frequencies in  
 262 the given experiment.

263 In Fig. S9 we consider different numbers of haplotypes sharing the same beneficial allele. The  
 264 more haplotypes share the same selective advantage, the less accurate the reconstruction be-  
 265 comes, unless the experiment is run for enough time to resolve the competition. If the competi-  
 266 tion is resolved and one or few haplotype(s) prevail, the reconstruction can reach high accuracy,  
 267 however.

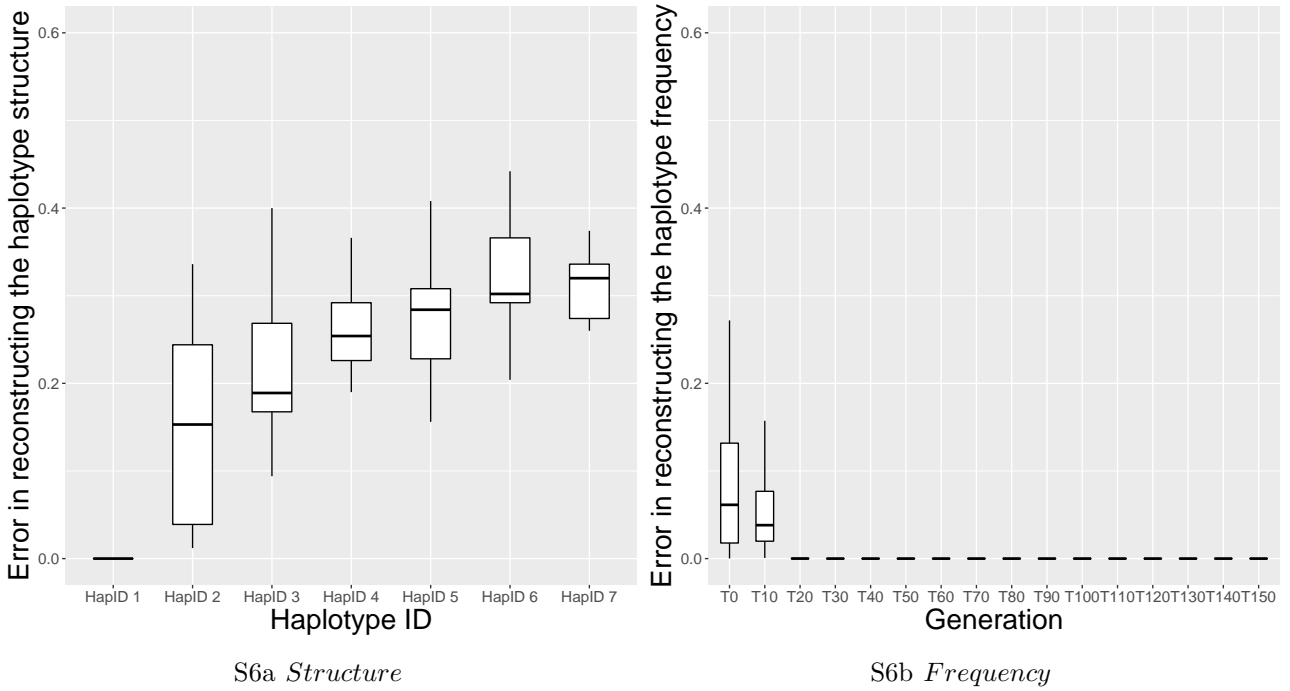

Figure S6: Haplotype reconstruction error for our basic selection scenario with *C. elegans* based on 100 simulation runs. (a) Proportion of wrongly classified SNPs for each reconstructed haplotype. The haplotypes are displayed in decreasing order according to the cumulative frequency over time. (b) Absolute difference between the true and estimated haplotype frequencies for each time point at which sequencing information is available.

268 When looking at Fig. S10 we can see that a coverage of 5 is too low for accurate pooled allele  
 269 frequency estimates. Thus our method cannot provide good estimates. When the coverage  
 270 increases above  $\lambda = 20$ , not much accuracy is gained anymore. For our considered designs,  
 271 more time points will be more beneficial than more reads in terms of accuracy. Compare for  
 272 example, the results from our three experimental designs with fewer time points (e.g. 4) and  
 273 high coverage ( $\lambda = 80$ ) from Fig. S8 against those with more time point (16) and low coverage  
 274 (e.g.  $\lambda = 20$ ) from Fig. S10.

275 The last parameter we considered is the number of different haplotypes in the founder popu-  
 276 lation (Fig. S11). Our simulations do not show a clear trend here. An intermediate number  
 277 of haplotypes relative to the population size often seems to lead to the highest accuracy, this  
 278 may be since in this case some - but not all- of the beneficial haplotypes tend to get lost by drift.

279

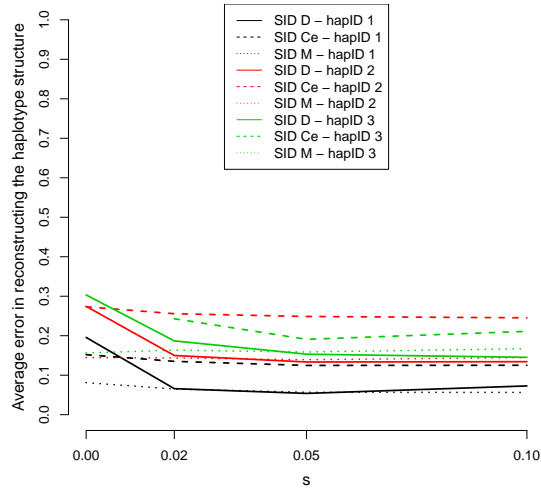

S7a Structure

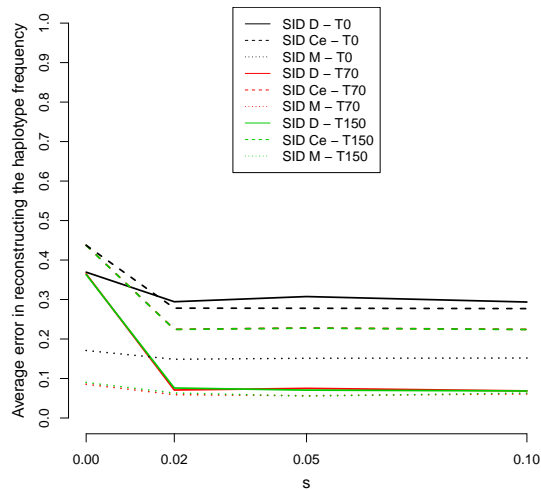

S7b Frequency

Figure S7: Dependence of the quality of our reconstruction approach on the selection coefficient. Simulation setup:  $s \in 0, 0.02, 0.05, 0.1$  and all the other parameters as in Section S3. Results for *D. simulans* (solid lines), *C. elegans* (dashed lines), and the mice experiment (dotted lines) are shown. (a) Error in reconstructing the haplotype structure versus different values of the selection coefficient. For each experimental design, results for the three most frequent haplotypes are shown: hapID 1 (black lines), hapID 2 (red lines), and hapID 3 (green lines). (b) Error in reconstructing the haplotype frequencies versus different values of the selection coefficient. For each experimental design, results for time points T0 (black lines), T70 (red lines), and T150 (green lines) are shown.



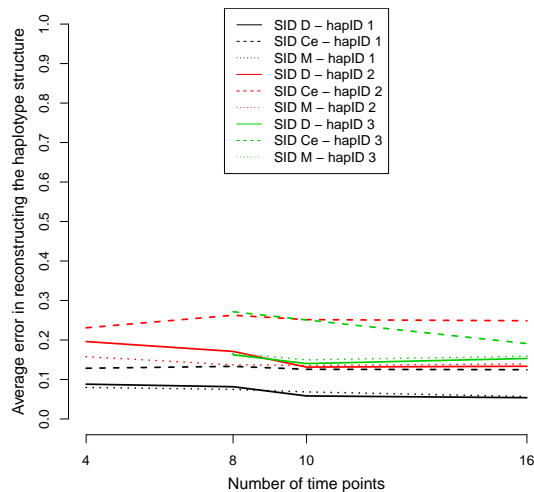

S8a *Structure*

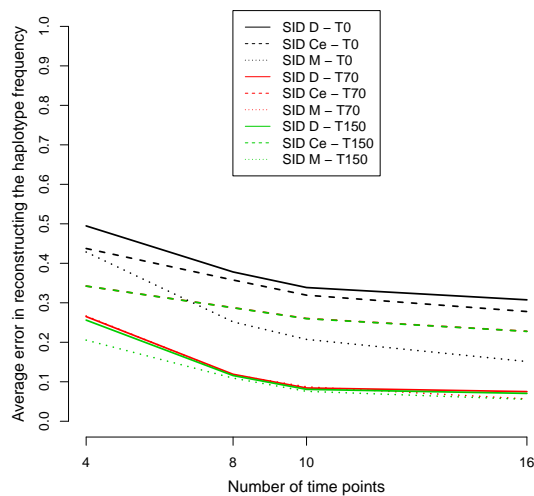

S8b *Frequency*

Figure S8: Dependence of the quality of our reconstruction approach on the number of sequenced time points. Results for *D. simulans* (solid lines), *C. elegans* (dashed lines), and the mice experiment (dotted lines) are shown. (a) Error in reconstructing the haplotype structure versus different numbers of sequenced time points. For each experimental design, results for the three most frequent haplotypes are shown: hapID 1 (black lines), hapID 2 (red lines), and hapID 3 (green lines). (b) Error in reconstructing the haplotype frequencies versus different numbers of sequenced time points. For each experimental design, results for time points T0 (black lines), T70 (red lines), and T150 (green lines) are shown.

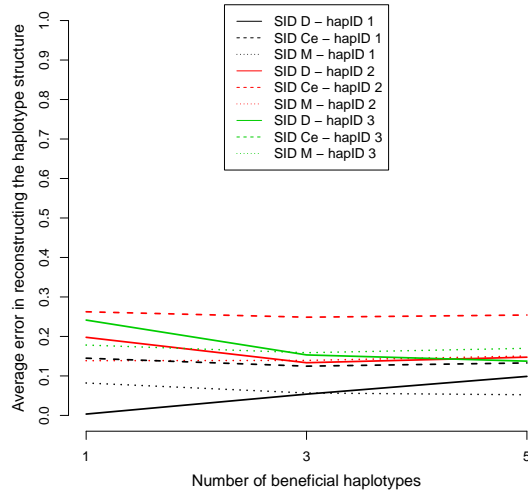

S9a *Structure*

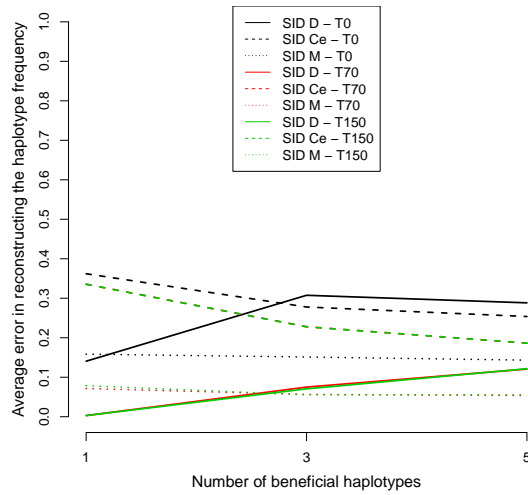

S9b *Frequency*

Figure S9: Dependence of the quality of our reconstruction approach on the number of haplotypes sharing the beneficial allele. Simulation setup: Number of haplotypes sharing the beneficial allele  $\in \{1, 3, 5\}$  and all the other parameters as in Section S3. Results for *D. simulans* (solid lines), *C. elegans* (dashed lines), and the mice experiment (dotted lines) are shown. (a) Error in reconstructing the haplotype structure versus different numbers of haplotypes sharing the beneficial allele. For each experimental design, results for the three most frequent haplotypes are shown: hapID 1 (black lines), hapID 2 (red lines), and hapID 3 (green lines). (b) Error in reconstructing the haplotype frequencies versus different numbers of haplotypes sharing the beneficial allele. For each experimental design, results for time points T0 (black lines), T70 (red lines), and T150 (green lines) are shown.

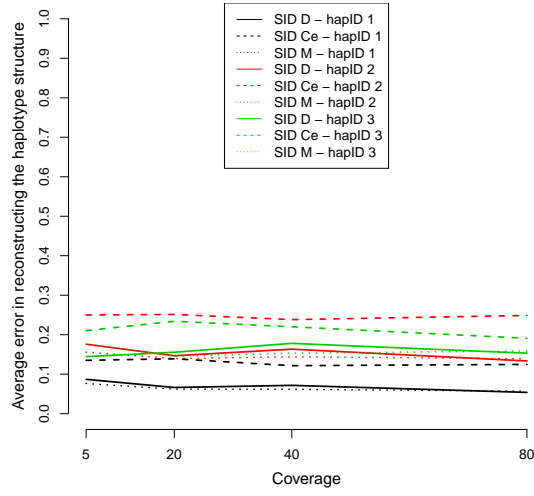

S10a *Structure*

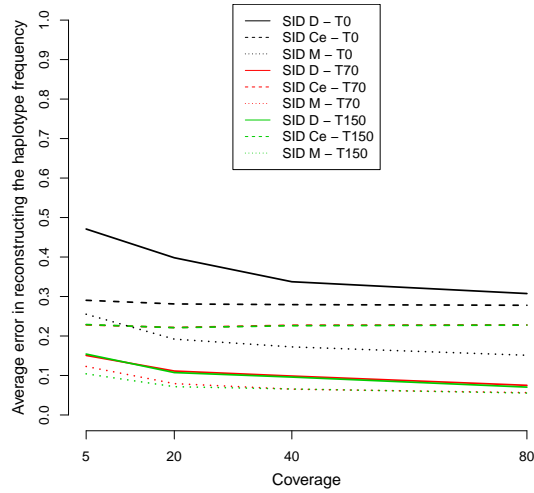

S10b *Frequency*

Figure S10: Dependence of the quality of our reconstruction approach on the mean coverage value  $\lambda$ . Simulation setup:  $\lambda \in 5, 20, 40, 80$  and all the other parameters as in Section S3. Results for *D. simulans* (solid lines), *C. elegans* (dashed lines), and the mice experiment (dotted lines) are shown. (a) Error in reconstructing the haplotype structure versus different values of  $\lambda$ . For each experimental design, results for the three most frequent haplotypes are shown: hapID 1 (black lines), hapID 2 (red lines), and hapID 3 (green lines). (b) Error in reconstructing the haplotype frequencies versus different values of  $\lambda$ . For each experimental design, results for time points T0 (black lines), T70 (red lines), and T150 (green lines) are shown.

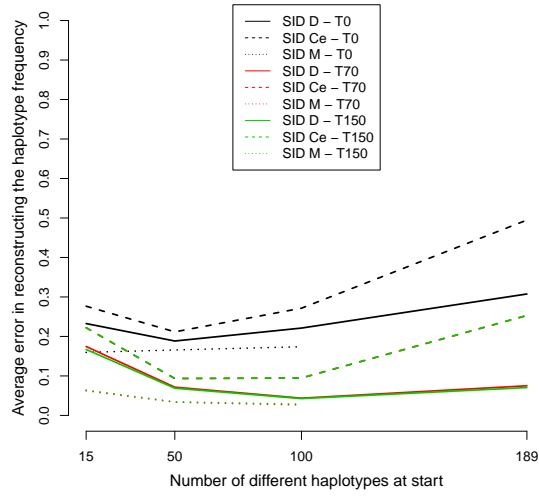

S11a *Structure*

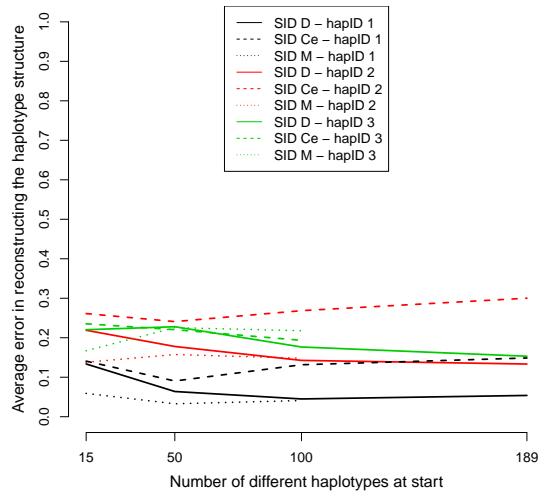

S11b *Frequency*

Figure S11: Dependence of the quality of our reconstruction approach on the number of different haplotypes in the founder population. Simulation setup: Number of different haplotypes in the founder population  $\in \{15, 50, 100, 189\}$  and all the other parameters as in Section S3. Results for *D. simulans* (solid lines), *C. elegans* (dashed lines), and the mice experiment (dotted lines) are shown. (a) Error in reconstructing the haplotype structure versus different number of different haplotypes in the starting population. For each experimental design, results for the three most frequent haplotypes in the starting population are shown: hapID 1 (black lines), hapID 2 (red lines), and hapID 3 (green lines). (b) Error in reconstructing the haplotype frequencies versus different number of different haplotypes in the starting population. For each experimental design, results for time points T0 (black lines), T70 (red lines), and T150 (green lines) are shown.

## S5 Accuracy measures

When applying our method to real data the true haplotypes are unknown and the error cannot be assessed. For this reason, we provide measures of accuracy for the full reconstruction (namely  $R^2$ ) for the haplotype structures and for the haplotype frequencies (see Section S2-5 for a more detailed explanation on how the scores are computed). To see how well these accuracy measures coincide with the actual amount of error, we provide simulation results for our three simple selection scenarios. We expect high scores when the error is low and vice-versa.

We plot  $R^2$  against the overall error in the reconstruction of the haplotype frequency for our three simple selection scenarios in Fig. S12. This figure shows that for the scenario with small population size the correlation between  $R^2$  and error is relatively high (0.799), however for large population sizes either the correlation is low (0.421) or the  $R^2$  is underestimating our error in reconstruction (see Fig. S12c). When the correlation is low, the error is only slightly over estimated by  $R^2$ , whereas in the case of Fig. S12c we have a group of scenarios where the  $R^2$  is too liberal. However, if we discard the scenarios where the haplotype frequency change of the most frequent reconstructed haplotype is small ( $< 0.1$ ) then the correlation in Fig. S12b increases up to 0.521 and the scenarios where  $R^2$  is underestimating the error in S12c are not included in the analysis anymore. If the frequency change of the dominant haplotype is small, it means that selection is either not present (neutral dynamic in a large population), or its signal cannot be captured by our method. Therefore we recommend to look at the combination of both  $R^2$  and frequency change. This was the motivation for our filtering criteria proposed in Section S2-5.

Our structure specific stability score (see equation S7 in section S2-5) is also correlated with the error in the reconstructed haplotype configuration (see Figs. S13a, S14a, and S15a). The high correlation shows that this measure is useful in applications. To test our accuracy measure for the haplotype frequencies, we checked how often each true frequency is contained inside the accuracy interval. The results in Fig. S16 show a high match between our bands and the true haplotypes, especially for late time points. Histograms of band sizes for these three scenarios can be found in figures S13b, S14b, and S15b, and they reveal that the bands are usually quite small (about 50% or more of the observed bandwidth being smaller than 0.05 in the worst scenario). These results demonstrate that these scores are concordant with the actual errors.

We recommend to use the haplotype specific stability intervals and stability scores after ensuring that our overall quality measures ( $R^2$  and frequency change of the dominant haplotype) are good enough.

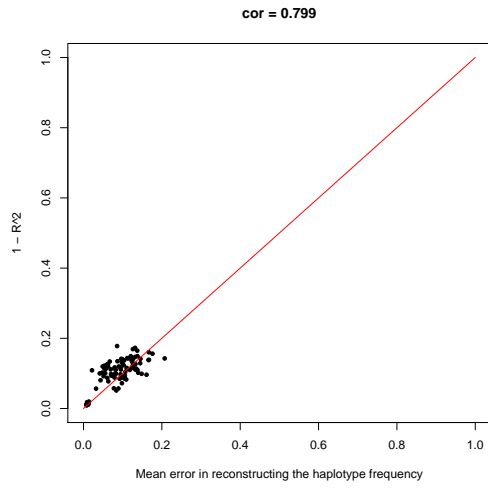

S12a *Longshank mice exp.*

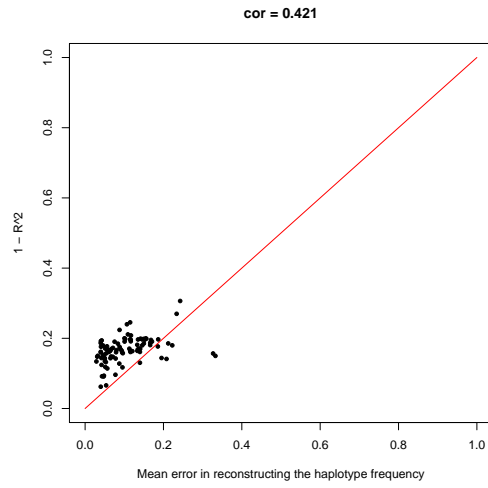

S12b *D. simulans*

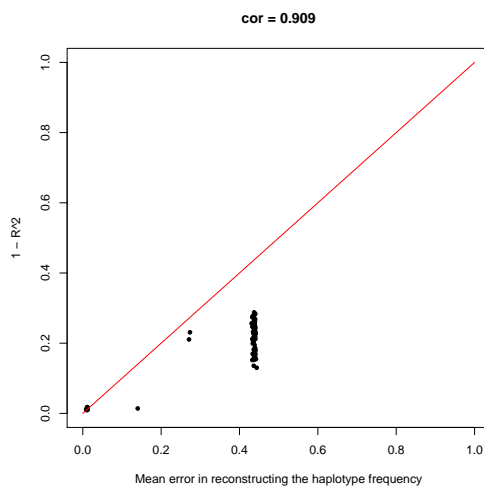

S12c *C. elegans*

Figure S12: Mean error in reconstructing the haplotype frequency versus  $1 - R^2$  for (a) the Longshank mice experimental design, (b) the *D. simulans* experimental design, and (c) the *C. elegans* experimental design

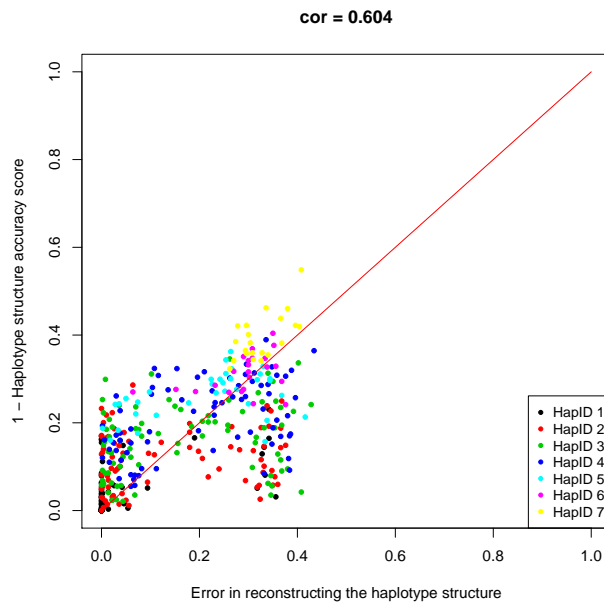

*S13a Structure*

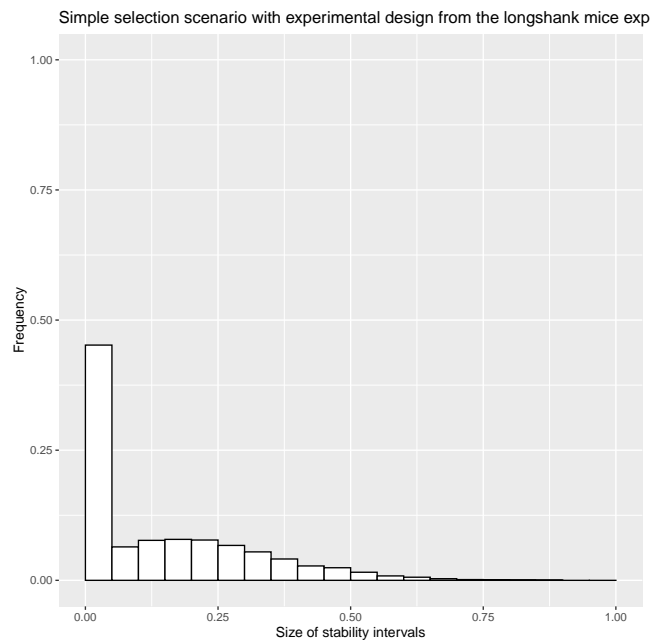

*S13b Frequency*

Figure S13: (a) Proportion of incorrectly estimated alleles when reconstructing the haplotype structure versus the corresponding accuracy scores for the Longshank mice experimental design. (b) Size of the accuracy intervals for the reconstructed haplotype frequency for the Longshank mice experimental design.

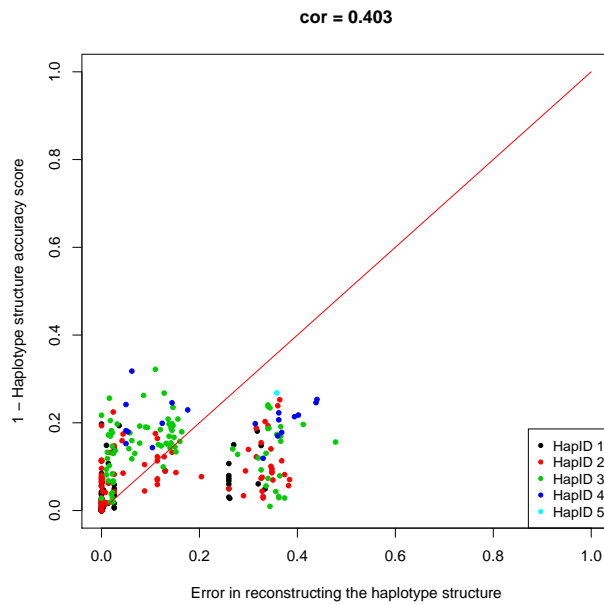

*S14a Structure*

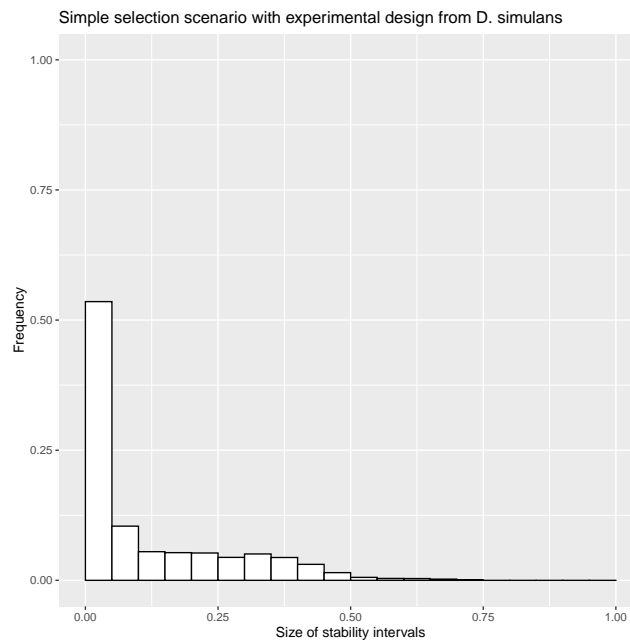

*S14b Frequency*

Figure S14: (a) Proportion of incorrectly estimated alleles when reconstructing the haplotype structure versus the corresponding accuracy scores for the *D. simulans* experimental design. (b) Size of the accuracy intervals for the reconstructed haplotype frequency for the *D. simulans* experimental design.



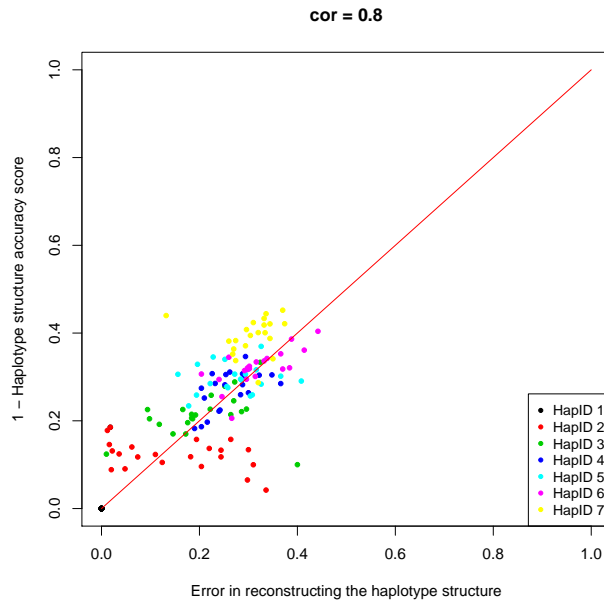

*S15a Structure*

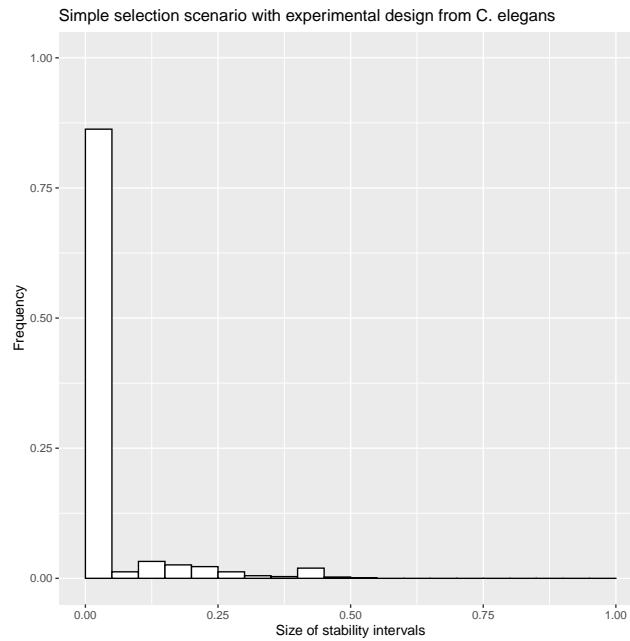

*S15b Frequency*

Figure S15: (a) Proportion of incorrectly estimated alleles when reconstructing the haplotype structure versus the corresponding accuracy scores for the *C. elegans* experimental design. (b) Size of the accuracy intervals for the reconstructed haplotype frequency for the *C. elegans* experimental design.

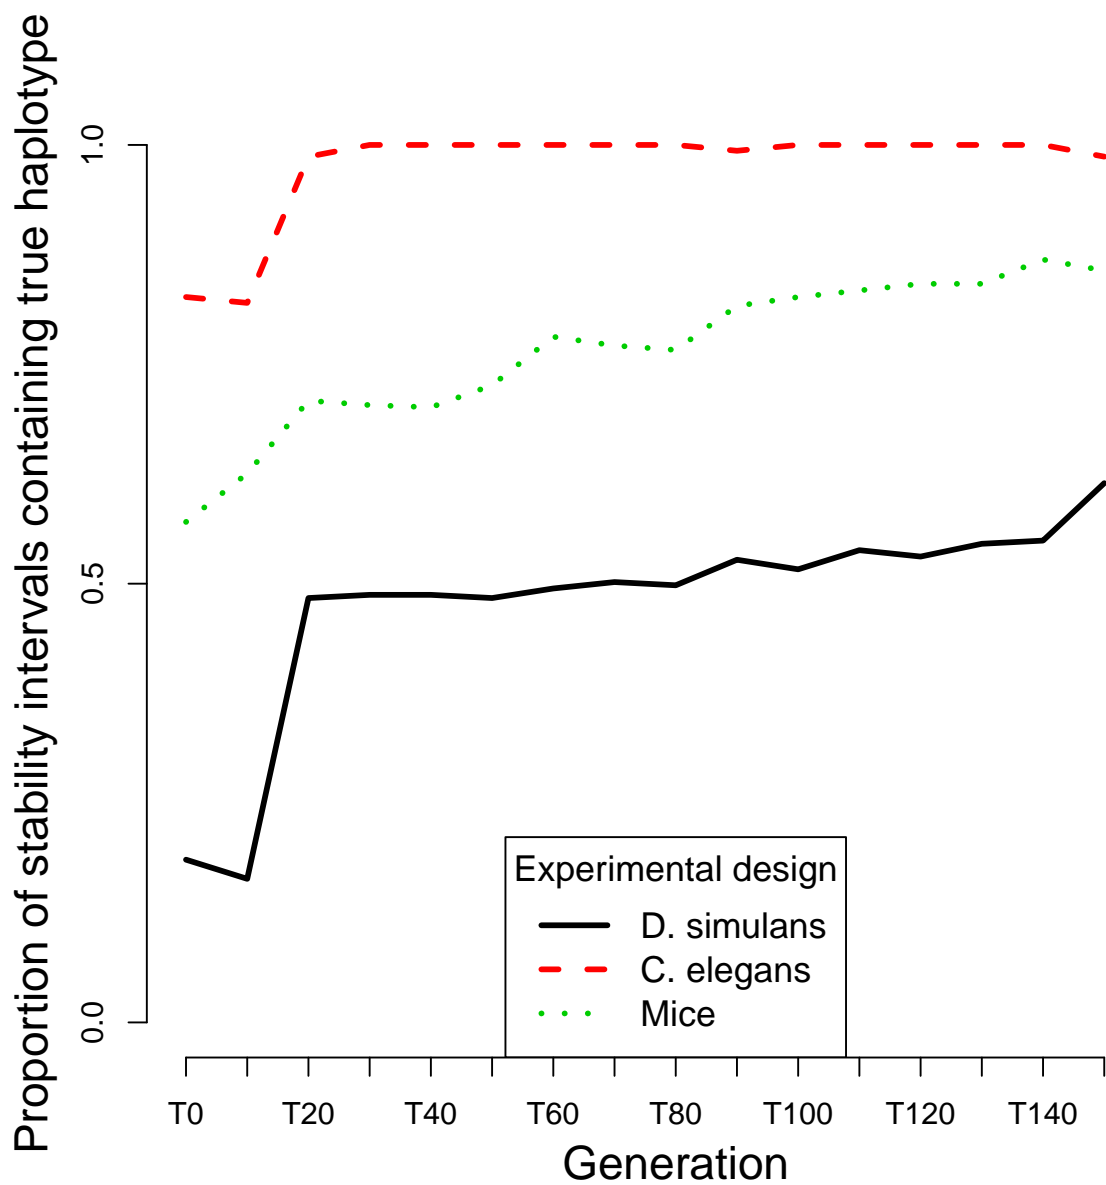

Figure S16: Proportion of stability intervals containing the true haplotype for our three simple selection scenarios.

313 **S6 Improved allele frequency estimates: additional re-**  
 314 **sults**

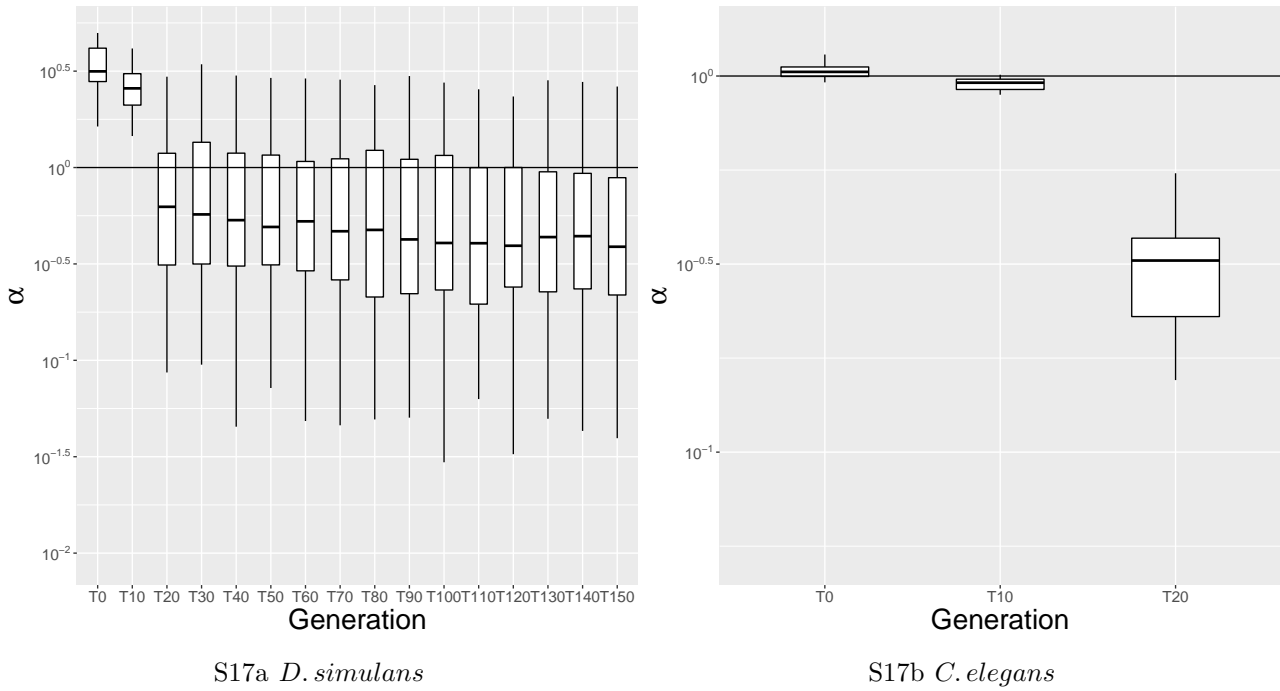

Figure S17: Error ratio ( $\alpha$ ) between haplotype based allele frequency estimates (numerator) and the pool sequencing estimates (denominator) plotted on a log-scale. Results from 100 simulation runs based on the experimental designs in [Barghi et al., 2019] and [Noble et al., 2019].

315 Late time points for the *C. elegans* example are not shown as both errors in reconstruct-  
 316 ing the allele frequency data are negligible and thus the ratio cannot be computed. Further  
 317 information on the later time point can be found in Fig. S20c where all scenarios are included.

## 318 **S7 Analysis of outliers**

319 Here we consider all the simulation results for the three simple selection scenarios without  
320 filtering using  $R^2$  and the frequency change of the haplotype with highest frequency. Figs. S18,  
321 S19, and S20 show the quantiles of the errors in reconstructing the haplotype frequency and  
322 structure and for  $\alpha$ . The proportion of scenarios leading to outliers in the error measurements is  
323 15%, 19%, and 78% for the simulations based on the *Drosophila simulans*, Longshank mice, and  
324 *C. elegans* experimental design respectively. For *C. elegans* the proportion of outlier simulation  
325 runs is considerably higher than for the other two scenarios. Indeed, the population size in  
326 the *C. elegans* experiment is much larger than for the other organisms. When the dynamic is  
327 neutral in such a large population, there is a large number of haplotypes at very low frequency.  
328 These haplotypes are often aggregated within a few estimates at intermediate (and constant)  
329 frequency.

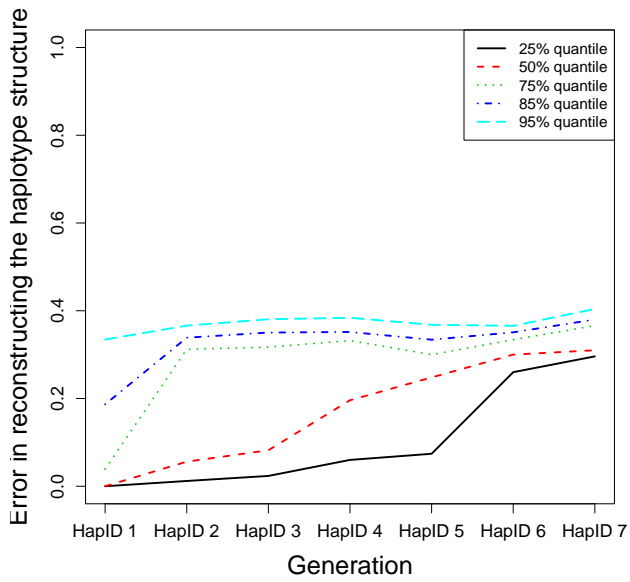

S18a *Longshank mice exp.*

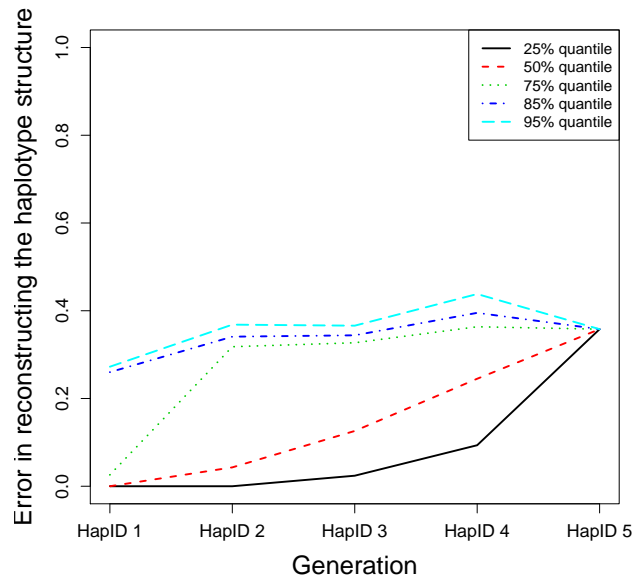

S18b *D. simulans*

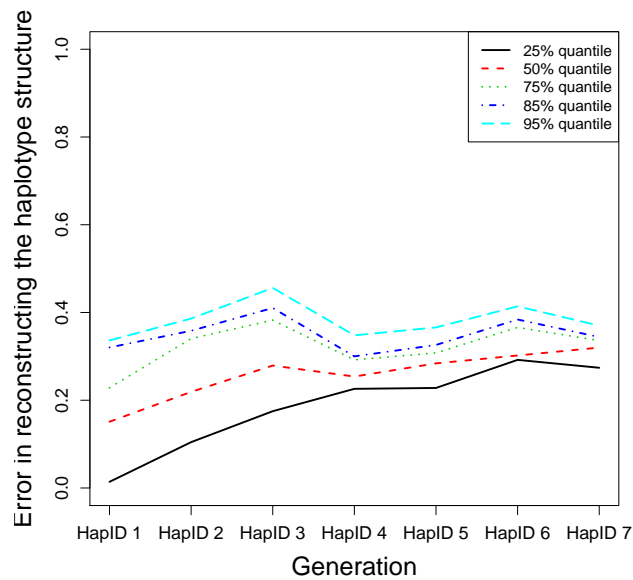

S18c *C. elegans*

Figure S18: Quantiles of the error in reconstructing the haplotype structure for (a) the Longshank mice experimental design, (b) the *D. simulans* experimental design, and (c) the *C. elegans* experimental design.

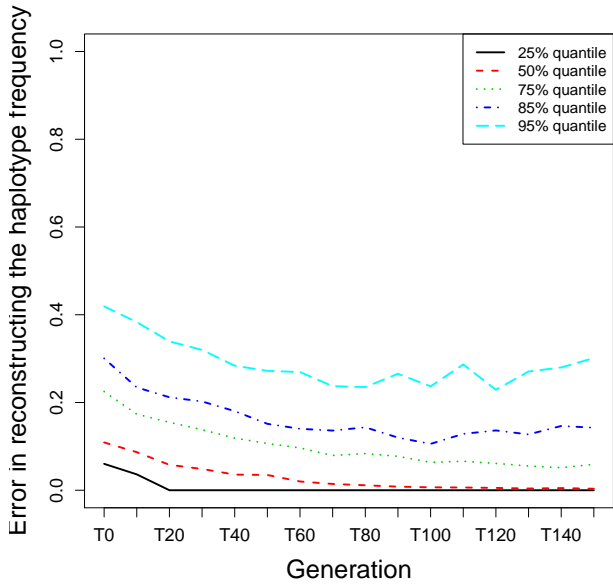

S19a *Longshank mice exp.*

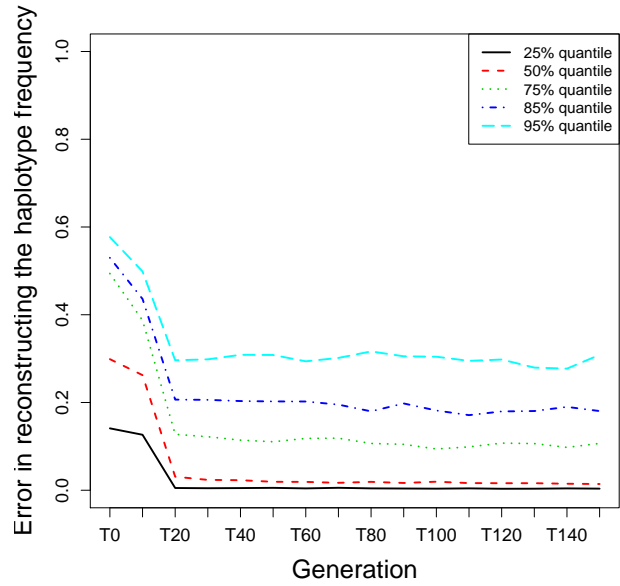

S19b *D. simulans*

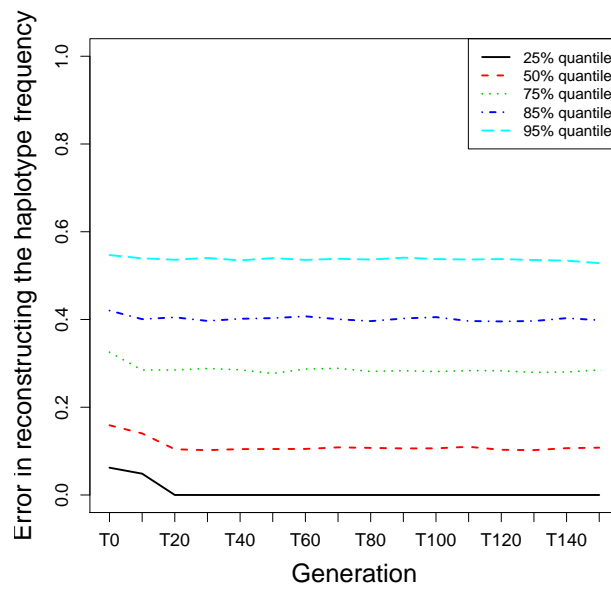

S19c *C. elegans*

Figure S19: Quantiles of the error in reconstructing the haplotype frequency for (a) the Longshank mice experimental design, (b) the *D. simulans* experimental design, and (c) the *C. elegans* experimental design.

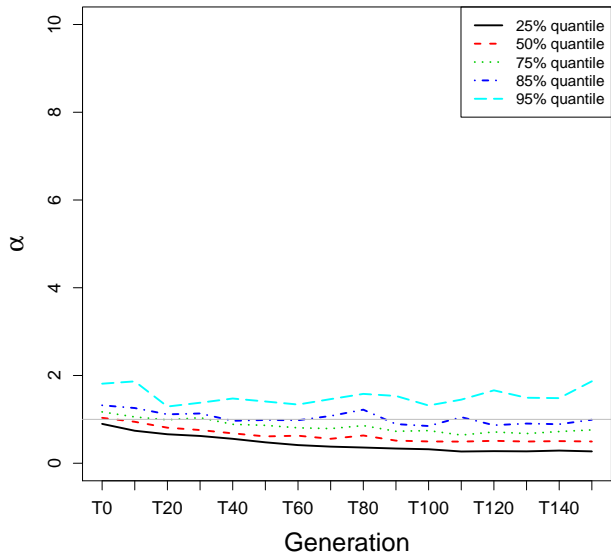

S20a *Longshank mice exp.*

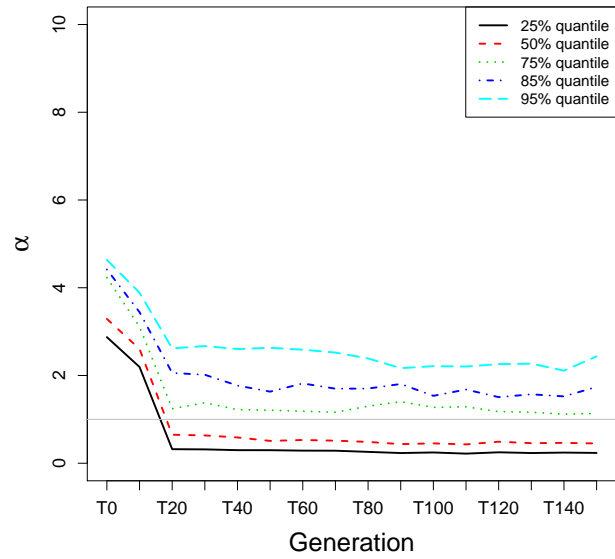

S20b *D. simulans*

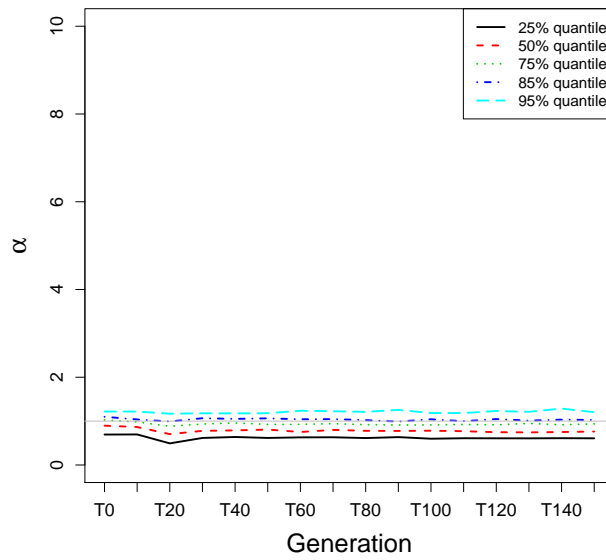

S20c *C. elegans*

Figure S20: Quantiles of the ratio between the error in estimating the allele frequencies from the reconstructing haplotypes versus pool sequencing ( $\alpha$ ) for (a) the Longshank mice experimental design, (b) the *D. simulans* experimental design, and (c) the *C. elegans* experimental design.

## 330 S8 Recombination

331 We simulated data involving recombination with MimicrEE2 [Vlachos and Kofler, 2018]. For  
 332 this purpose, we considered a population of 500 individuals with 10 founder haplotypes and a  
 333 range of recombination rates between 0 and 20 cM/Mb. We used a sample from the *Drosophila*  
 334 *melanogaster* genetic reference panel [MacKay et al., 2012] to build our starting population.  
 335 We ran our simulations for 150 generations assuming that there are three SNPs each having  
 336 a beneficial allele under selection of strength  $s = 0.1$ . High recombination rates increase the  
 337 probability of recombination events putting beneficial SNPs on a new more beneficial haplotype  
 338 that could rise then considerably in frequency. We store data every tenth generation at time  
 339 points  $G_0, G_{10}, \dots, G_{150}$ . After obtaining the simulated populations, we add sequencing noise  
 340 to our allele frequency data via binomial sampling under a Poisson coverage with mean 80. The  
 341 recombination rate has been assumed to be homogeneous throughout the whole region. As in  
 342 Section 3.1, we performed 100 simulation runs per recombination rate. The results were filtered  
 343 and those kept for further analysis, where  $R^2 > 0.8$  and a frequency change of more than 0.1  
 344 was observed for the most frequent haplotype. Our recombination rate in cM/Mb is converted  
 345 by MimicrEE2 to a lambda-value of a Poisson distribution using Haldane’s map function.

346 The figures below summarize our simulation results and are discussed in Section 3.3.

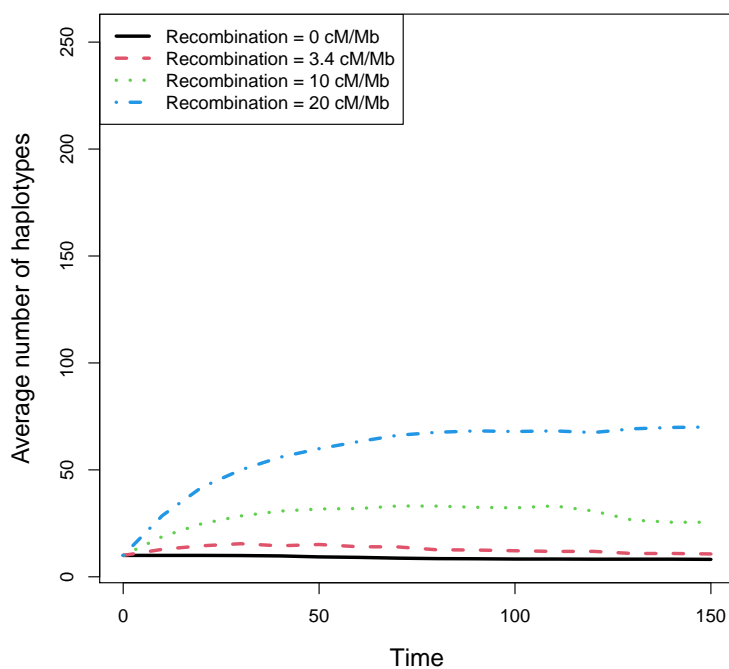

Figure S21: Mean number of haplotypes present at the time points  $\{0, 10, 20, \dots, 150\}$ . Each color represents a different recombination rate. For details on this simulation experiment, see the text in this Section.



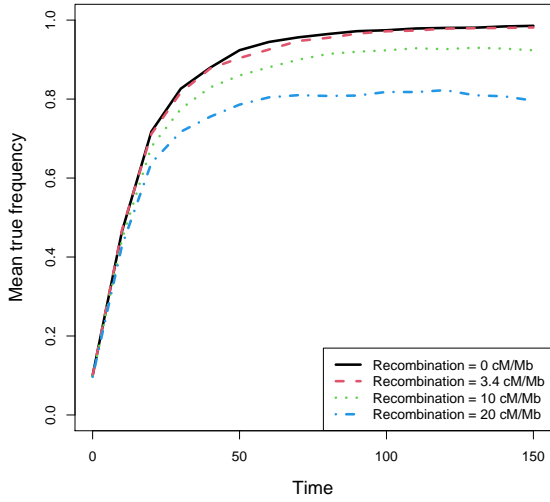

S22a

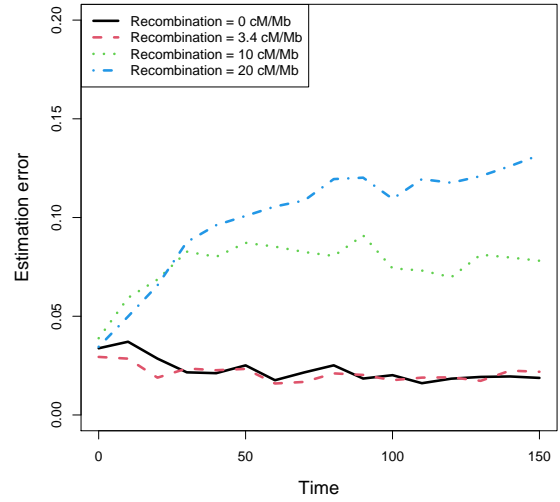

S22b

Figure S22: Frequency of the most abundant haplotype. (a) True frequency of the most frequent reconstructed haplotype: For the most abundant estimated haplotype, the frequencies of the matching true haplotype are averaged across all simulation runs. (b) Estimation error for the most frequent haplotype: Average (across simulation runs) absolute difference between the true and estimated haplotype frequencies for each time point at which sequencing information is available. Different colors and line types indicate the recombination rates  $r \in \{0, 3.4, 10, 20\}$ .

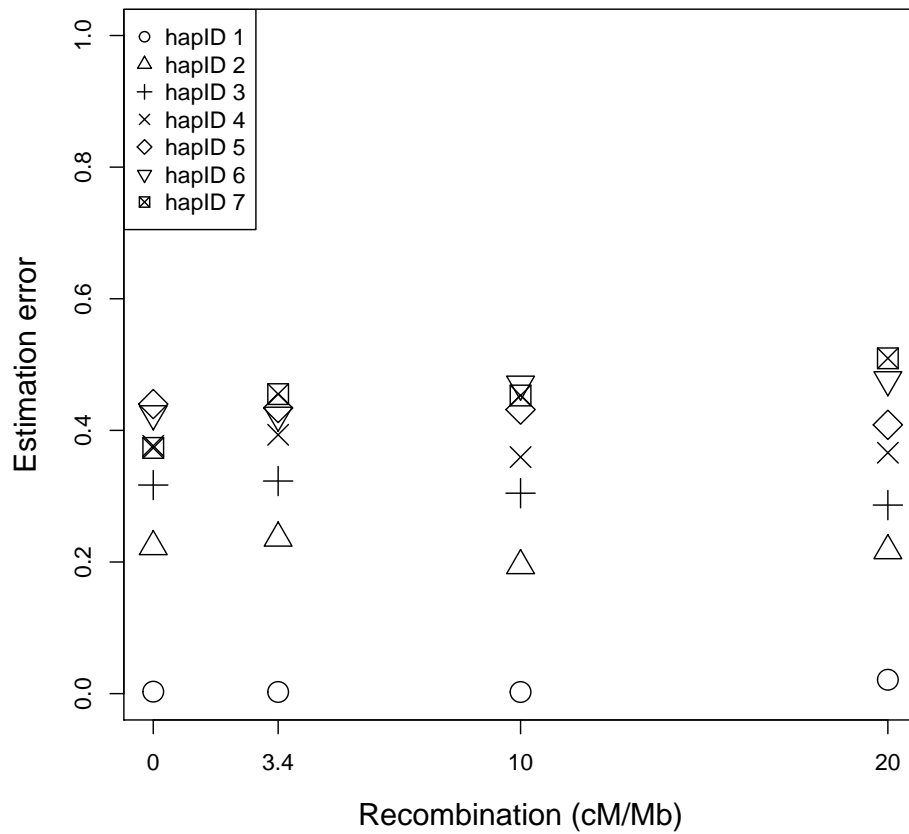

Figure S23: Errors in the estimated haplotype structures for different values of the recombination rate: Proportion of wrongly classified SNPs averaged across simulation runs. Each reconstructed haplotype is matched to the closest true one. The haplotypes are numbered in decreasing order according to their cumulative estimated frequency.

## S9 Validation of our results using read data

We used read data from [Barghi et al., 2019] as a further validation of our reconstructed haplotypes. These data are provided by the authors after the reads were trimmed and mapped to the genome and after duplicates have been removed. These steps, as well as the DNA extraction and library preparation are described in [Barghi et al., 2019]. In order to be consistent with the allele frequency data and thus with the reconstructed haplotypes we only used SNPs analysed in the original paper. Furthermore, as in [Barghi et al., 2019] for a given SNP we kept the information from the reads only when the respective base quality score was higher than 20. As in Section 4, for this analysis we chose a region under selection according to the p-values from the modified chi-squared test in [Spitzer et al., 2020]. Here, we considered the region from 11.239636 to 11.733131 Mb of chromosome 2L in replicate three. All comparisons with the reads are performed at generation 60.

For each read partially overlapping the region of interest we apply the following steps. First, we combined paired end reads to a long sequence with a missing part in the middle because read pairs belong to the same haplotype. Then, we polarize the set of read data for the rising allele, as we did for the allele frequency data.

In order to compare the read data with the reconstructed haplotypes, we considered sliding windows of 1000 SNPs and performed the following analysis on each window. For our first comparison, we selected the most similar read for each reconstructed haplotype and window. Fig. S24 shows the proportion of mismatches between haplotype and corresponding read without considering missing data. From the example we can see that most haplotypes have a good match with the reads, which is a further validation of the fact that the haplotype structure we reconstruct with our method is accurate. However, the number of positions entering this comparison for each read is limited (between 32 and 59). Indeed, there are always many missing values in each read as read length is limited and they might not overlap a region entirely and genomic positions might be filtered out for low base quality scores.

We decided then to examine these results in terms of haplotype frequency as well. Because reads are short and insert sizes generate missing values, we cannot compare the frequencies of the reads with those of the haplotypes directly. At the same time, using single SNPs would not be informative in this situation because we already validated the power of our method in reconstructing allele frequency data (see Section 3.2). Thus, we decided to consider the smallest available linked unit, and we performed our comparison on pairs of subsequent SNPs using the frequencies of the four possible genotypes of each pair.

The results from this comparison are shown in Fig. S25. From these examples we can see that also the frequency of the pairs of SNPs are estimated with low error from our reconstructed haplotypes, which strongly suggests that the reconstructed haplotypes capture the signal from the true haplotypes in the population correctly.

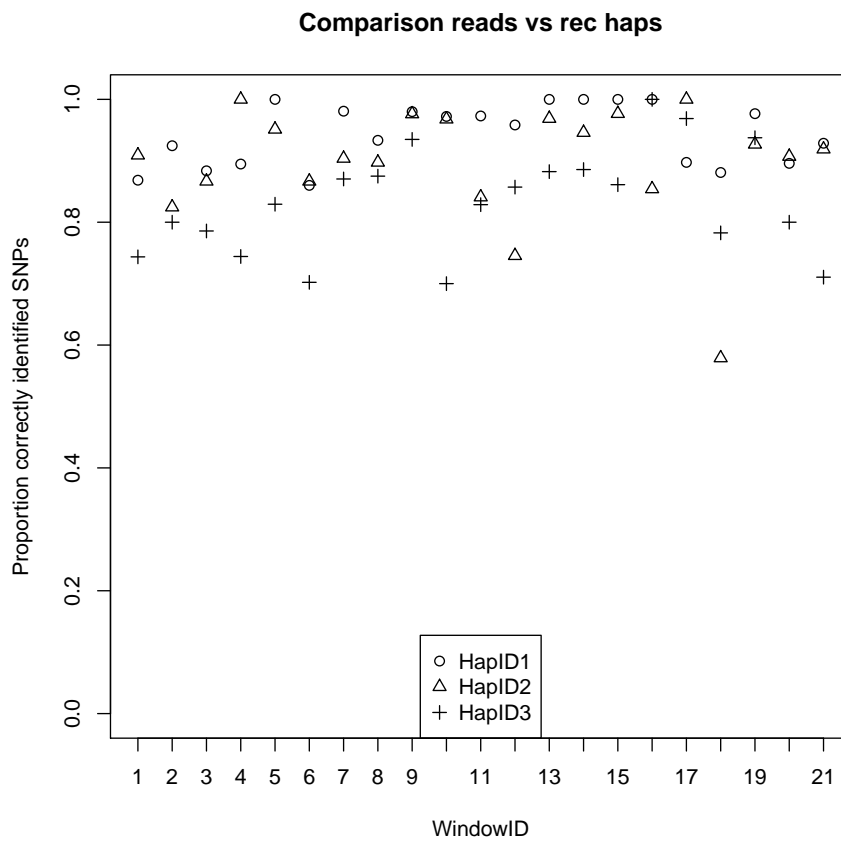

Figure S24: Comparison of the reconstructed haplotype structure with the read data.

**F60: comparison between reads and reconstructed haplotypes**

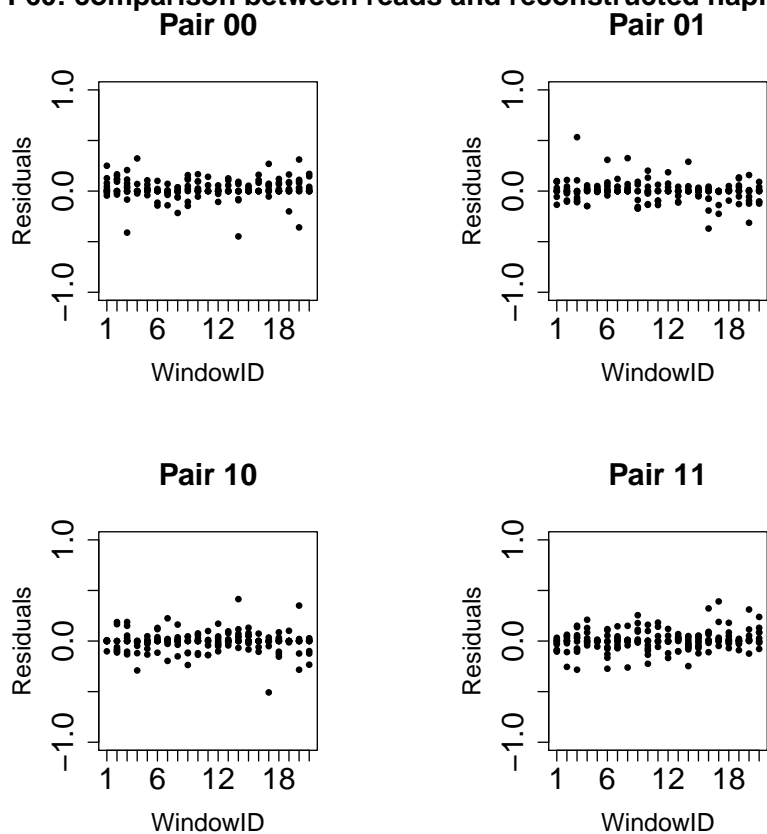

Figure S25: Residuals of the estimated frequency of pairs of SNPs from read data versus the estimated frequency of pairs of SNPs from reconstructed haplotypes.

384 **S10 Results for the Longshank mice experiment**

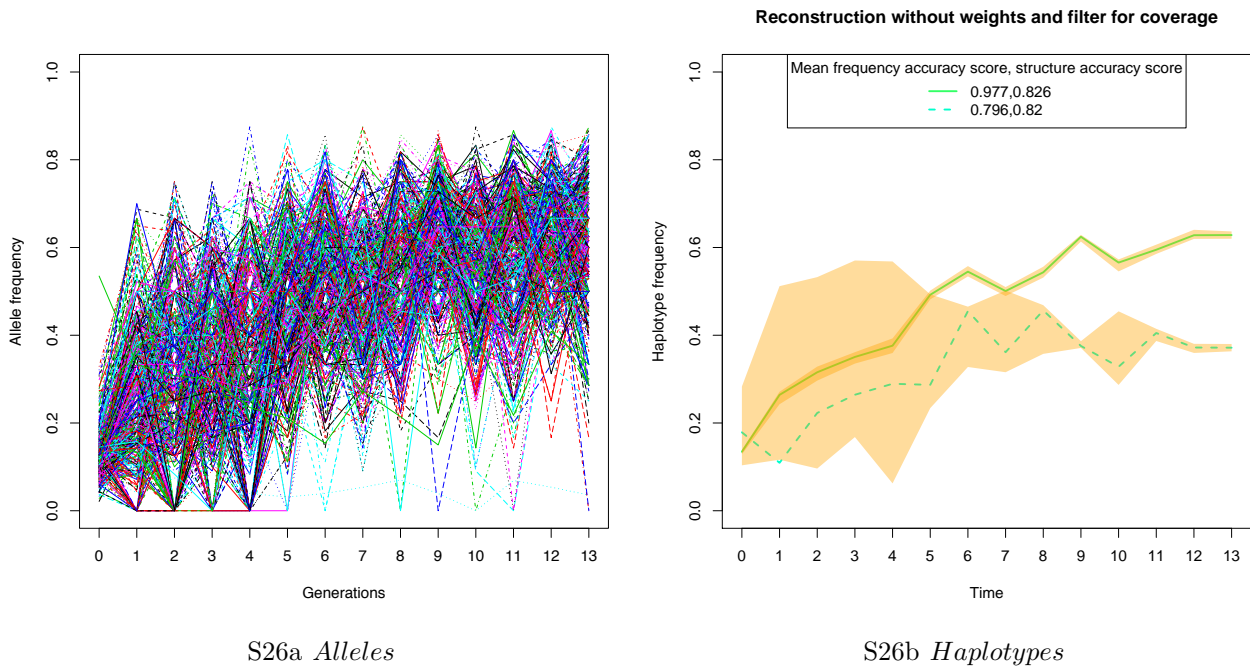

Figure S26: (a) Observed time-series of allele frequencies. (b) Reconstructed haplotype frequencies with accuracy intervals (in yellow) and mean accuracy scores.

385 **S11** Additional results from the *C. elegans* data set from  
 386 [Noble et al., 2019]

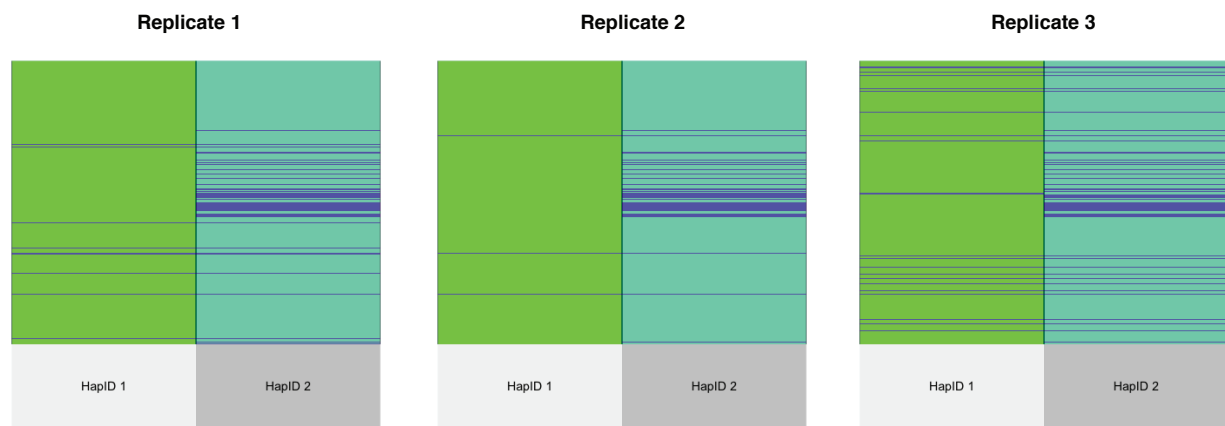

S27a *Structure*

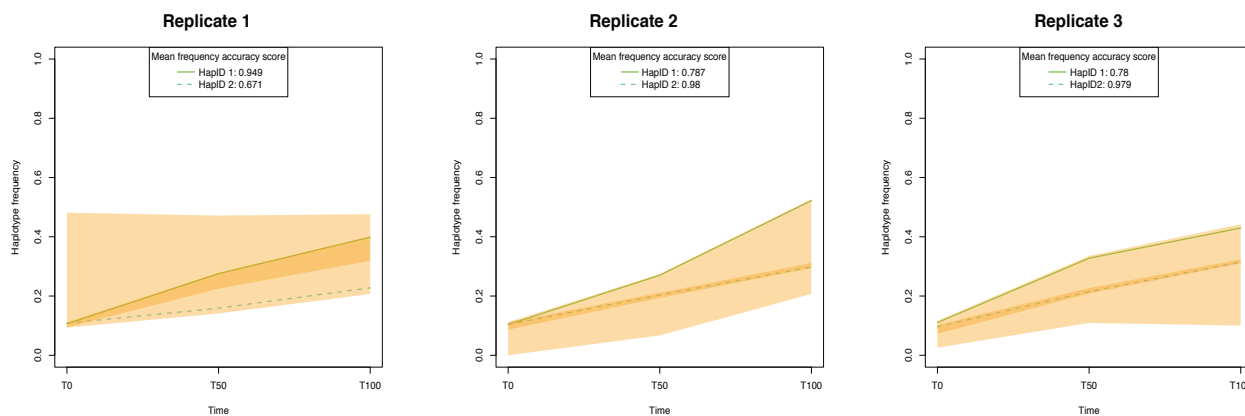

S27b *Frequency*

Figure S27: Haplotype reconstruction for data from [Noble et al., 2019] (a) Match between the haplotype structure reconstructed from the allele frequency data and the sequenced founder haplotypes. Blue lines indicate mismatch positions. (b) Reconstructed haplotype frequencies with accuracy intervals (in yellow) and mean accuracy scores.

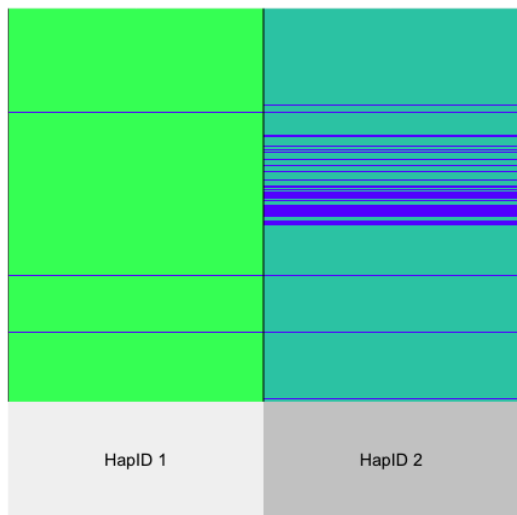

S28a *Structure*

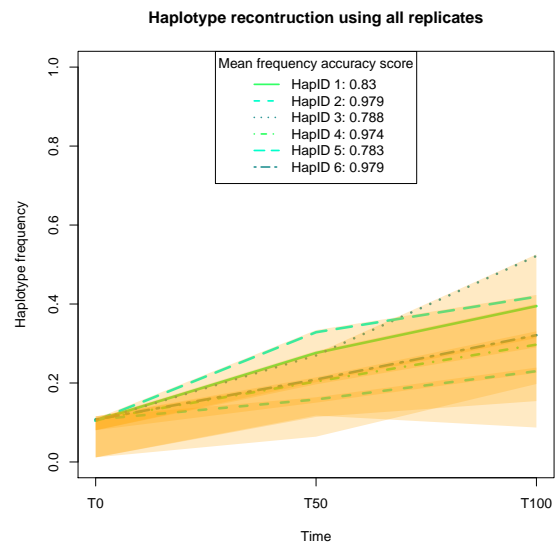

S28b *Frequency*

Figure S28: (a) Match between reconstructed haplotype structure and sequenced founder haplotypes using all the three replicates from [Noble et al., 2019] at the same time. Blue lines indicate mismatches. (b) Reconstructed haplotype frequencies with accuracy intervals (in yellow) and mean accuracy scores using all the three replicates from [Noble et al., 2019] at the same time.



387 **S12 Results from the HIV data set from**  
388 **[Zanini et al., 2015]**

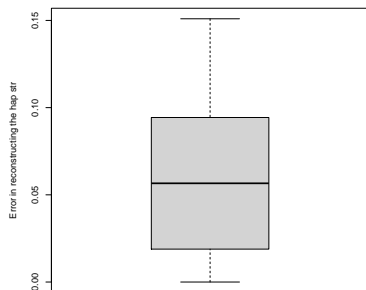

S29a *Structure*

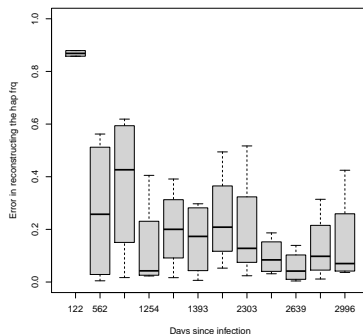

S29b *Frequency*

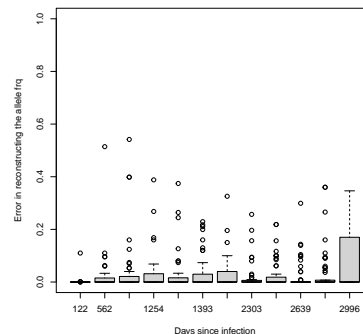

S29c *Allele frequency*

Figure S29: Errors in reconstructing the haplotype structure (left), haplotype frequency (center) and allele frequency (right) for `haploSep` applied to our real data set from patient 1 of [Zanini et al., 2015] and compared on the `vpu` region.

## 389 **S13 Comparison with other methods**

390 In this section we present more details on our method comparison in Section 5. For this purpose  
391 we carried out simulations for HIV scenarios. Furthermore, a real data example has also been  
392 considered. In this context, we compared `haploSep` with `CliqueSNV` on both the simulated and  
393 real data. Unfortunately, we could not obtain results for `CliqueSNV` for all simulated data sets  
394 since `CliqueSNV` crashed for 10 samples that were generated in 6 of the 20 simulation runs. We  
395 hypothesize that this occurred due to memory problems caused by a large number of candidate  
396 haplotypes (30GB memory were allocated to the task). We also considered a comparison with  
397 the read based method `PoolHapX` from [Cao et al., 2020]. For our simulated data we could  
398 not obtain any results for `PoolHapX`, again because of memory problems with the initial graph  
399 coloring part of the algorithm. Nevertheless, we were able to run `PoolHapX` on a very short  
400 genomic segment taken from our *D. simulans* E&R real data example. All comparisons have  
401 been done using standard model selection provided by the methods to choose the number of  
402 reconstructed haplotypes. Further details on the simulation setup are given in Section S13-1  
403 and details on the results are presented in Sections S13-2, S13-3, and S13-4.

### 404 **S13-1 Simulation design**

405 We simulated the data for this comparison using SLiM [Haller and Messer, 2019] using the  
406 simulation scenario considered in [Cao et al., 2020]. We followed the script `sweep_200loci.slim`  
407 (`PoolHapX` 1.0.0, downloaded 2/11/2020), but adapted this script to simulate 24 populations.  
408 We ran the simulations for a chromosome of length 9719 base pairs, the genome length of HIV.  
409 The reads were then aligned to an HIV reference genome available in the `PoolHapX` repository.  
410 We simulated 10,000 haploid generations under a sweep scenario. For further information  
411 see the SI in [Cao et al., 2020]. From the simulated data we extracted the true haplotype  
412 structures and frequencies, as well as the allele frequency data. As input data for `CliqueSNV`,  
413 we simulated reads matching the data following the pipeline from [Cao et al., 2020], and we  
414 used DWGSIM version 0.1.13 [Homer, 2010] to simulate the reads. `haploSep` has been applied  
415 to allele frequency data extracted from these reads.

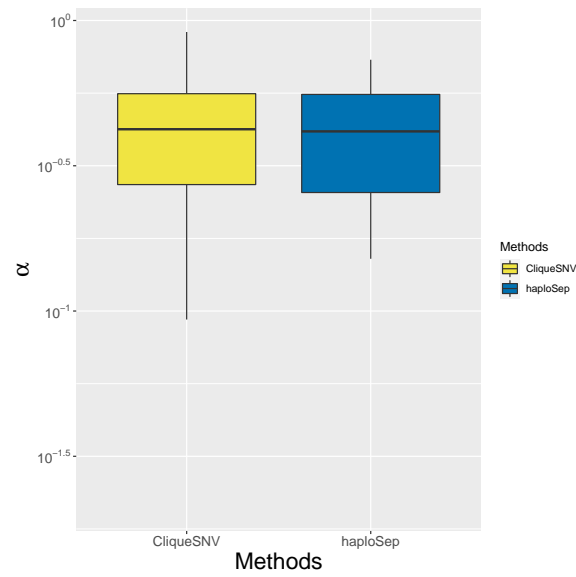

Figure S30: Error ratio ( $\alpha$ ) between haplotype based allele frequency estimates (numerator) and the pool sequencing estimates (denominator) plotted on a log-scale for **haploSep** versus **CliqueSNV**. See Section 3.2 for the definition of  $\alpha$ . All SNP positions where the observed minor allele frequency is larger than 0.05 in all samples have been used. These results have been derived using the same simulated data as for Fig.5

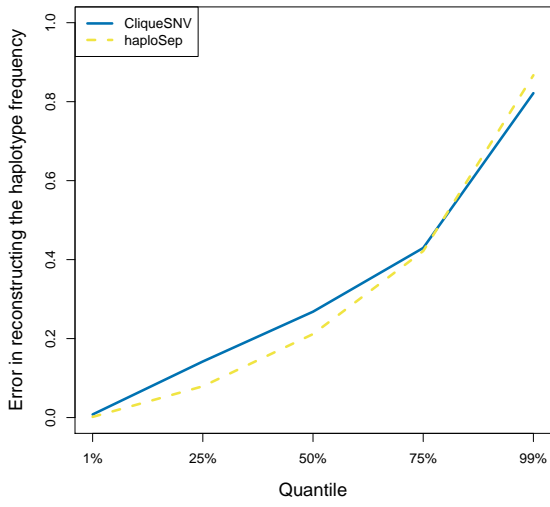

S31a *Frequency*

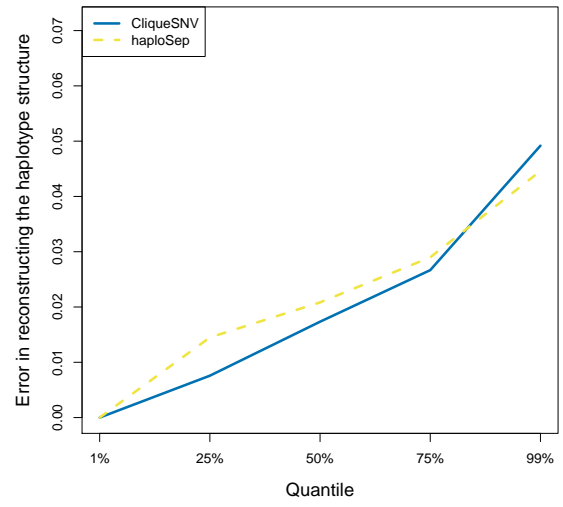

S31b *Structure*

Figure S31: Quantiles of the errors in reconstructing haplotype frequency (a) and structure (b) for both compared methods. The same data were used as in Figure 5.

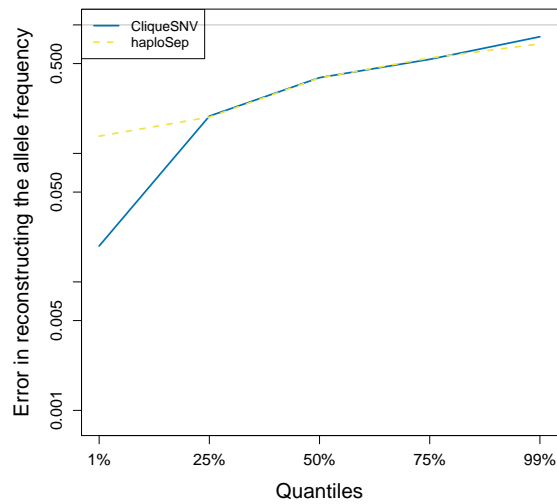

Figure S32: Quantiles of the error ratio ( $\alpha$ ) between haplotype based allele frequency estimates (numerator) and the pool sequencing estimates (denominator) plotted on a log-scale for haploSep versus CliqueSNV. The same data were used as in Figure S30.

417 **S13-3 HIV real data example**

418 Our data consist of 10 time points from HIV patient number 1 in [Zanini et al., 2015]. These  
419 data are available in a pre-processed form with the PoolHapX package. Our method comparison  
420 focuses on the *vpu* window containing 249 SNPs. Besides structure and frequencies, we also  
421 compared the sample allele frequencies to the ones reconstructed from the haplotypes and their  
422 estimated frequencies using haploSep and CliqueSNV. For a discussion of Figs. S33 and S34 we  
423 refer to Section 5 in the main text. In Fig. S35 we show that haploSep leads to fewer outliers,  
424 the same median accuracy, and slightly worse 75% percentiles. This is remarkable since this  
425 good performance is achieved using fewer haplotypes (4) than the competitor (7–9, depending  
426 on the sample), i.e., a less complex model.

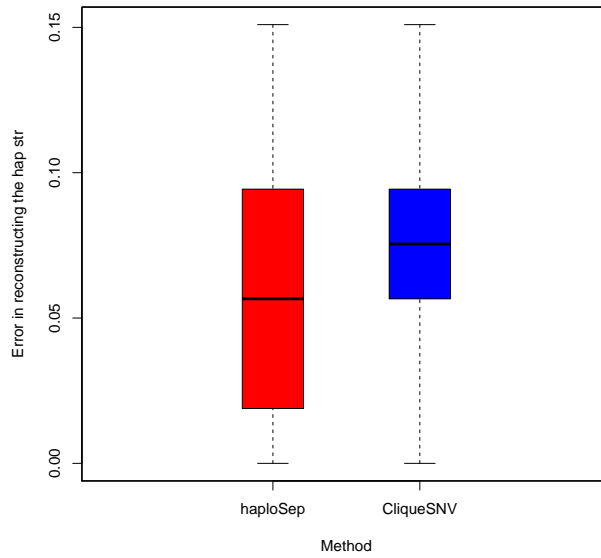

Figure S33: Error in estimating the haplotype structure for haploSep (left) and CliqueSNV (right) using our real longitudinal data set of patient 1 from [Zanini et al., 2015].

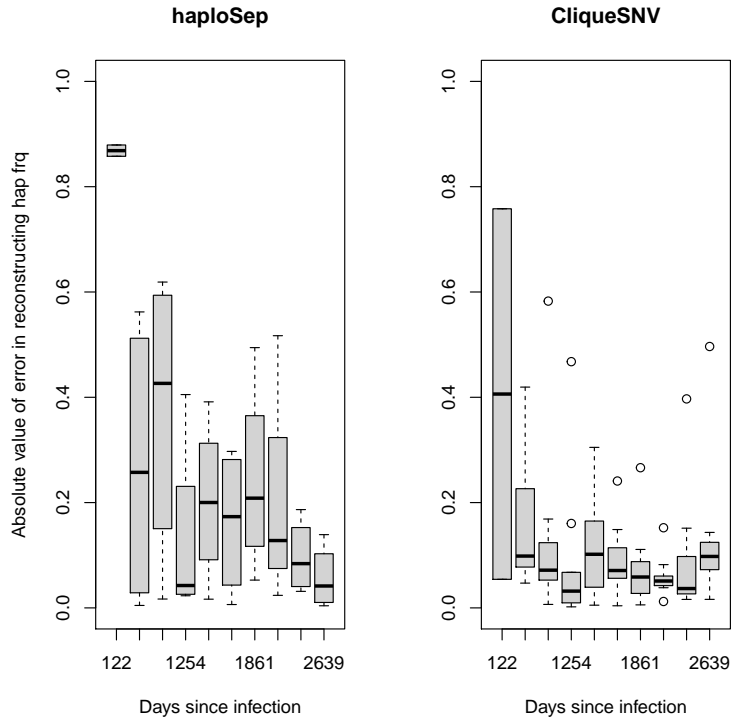

Figure S34: Error in estimating the haplotype frequencies for **haploSep** (left) and **CliqueSNV** (right) using patient 1 longitudinal data from [Zanini et al., 2015].

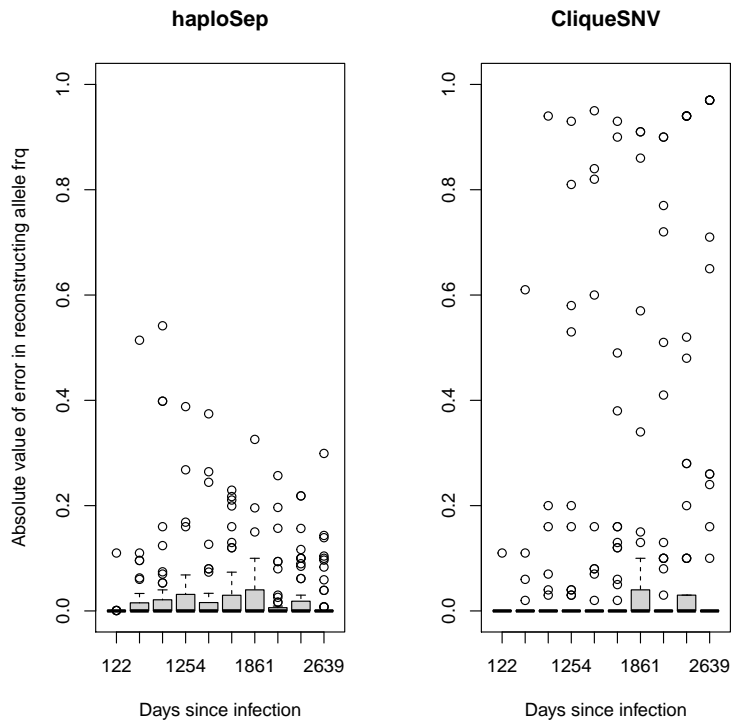

Figure S35: Error in estimating the allele frequencies for each SNP and each time point for **haploSep** (left), **CliqueSNV** (right) using patient 1 longitudinal data from [Zanini et al., 2015].

427 **S13-4 *Drosophila simulans* real data example.**

428 We considered a 2200bp region of the *Drosophila simulans* genome containing 95 SNPs, and  
 429 took our data from [Barghi et al., 2019] (chromosome 2L:11419333-11421533). We tried to  
 430 apply **CliqueSNV** on this data set using the -os and -oe options to select the above mentioned  
 431 chromosomal region from the FASTA files provided as reference genome. We obtained run time  
 432 errors however, indicating that the (20GB) memory of our machine was insufficient. We tried  
 433 to progressively decrease the window size, but were not able to resolve the problem.

434 Since **CliqueSNV** did not run for this data, we applied **PoolHapX** instead. **PoolHapX** required  
 435 2631 minutes to finish on this small data set. Since **PoolHapX** filters SNPs according to their  
 436 minor allele frequency (SI of [Cao et al., 2020]), we used the same set of remaining SNPs when  
 437 we applied our method. As an input to **haploSep** allele frequencies were computed from the  
 438 available ".bam" files using samtools and Popoolation2 [Kofler et al., 2011].

439 As the founder haplotype sequences are available in this experiment, we compared the  
 440 reconstructed haplotypes from both methods with the 189 founder sequences. For each method  
 441 we consider the most similar founder haplotype and report the percentage of SNPs of the  
 442 reconstructed haplotypes being identical to the founder sequences. **haploSep** reconstructs three  
 443 haplotypes and the proportions of matching SNPs are 0.64, 0.48, and 0.72. On the other hand  
 444 **PoolHapX** reconstructs 21 haplotypes typically less accurately, with proportions of matching  
 445 SNPs ranging from 0.48 to 0.60.

446 We also investigated the goodness of fit between the observed and predicted allele frequen-  
 447 cies for the competing methods. Fig. S36 shows that the product of the reconstructed haplotype  
 448 structures with their estimated frequencies provides a closer match to the observed allele fre-  
 449 quencies with **haploSep**. It is worth noting that this better fit is achieved based on a much less  
 450 complex model that uses 3 haplotypes compared to 21 with **PoolHapX**. Therefore the better fit  
 451 cannot be explained by overfitting.

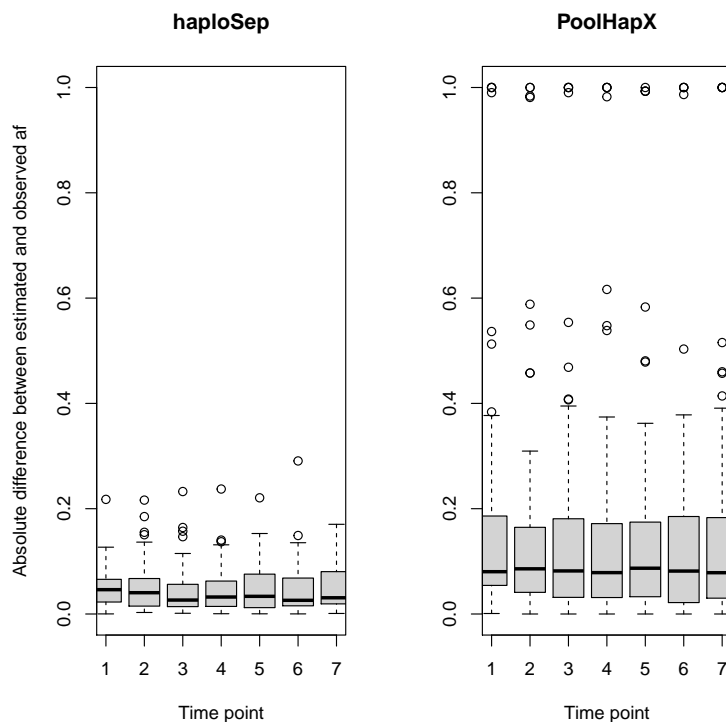

Figure S36: Error in estimating the allele frequencies for each SNP and each time point for **haploSep** (left) and **PoolHapX** (right) using [Barghi et al., 2019] data.

452 From a computational point of view, there is a striking difference in run time between these  
453 two methods. Indeed, the run time for `haploSep` was 0.572 seconds here, whereas for `PoolHapX`  
454 the run time was almost 2 days (2631 minutes) on a Mac Pro (2013) machine with 2,7 GHz  
455 12-Core Intel Xeon E5 Processor.



## References

- [Barghi et al., 2019] Barghi, N., Tobler, R., Nolte, V., Jakšić, A. M., Mallard, F., Otte, K. A., Dolezal, M., Taus, T., Kofler, R., and Schlötterer, C. (2019). Genetic redundancy fuels polygenic adaptation in *Drosophila*. *PLoS Biology*, 17(2):e3000128.
- [Behr et al., 2018] Behr, M., Holmes, C., and Munk, A. (2018). Multiscale blind source separation. *The Annals of Statistics*, 46(2):711–744.
- [Behr and Munk, 2017] Behr, M. and Munk, A. (2017). Identifiability for Blind Source Separation of Multiple Finite Alphabet Linear Mixtures. *IEEE Trans. Information Theory*, 63(9):5506–5517.
- [Cao et al., 2020] Cao, C., He, J., Mak, L., Perera, D., Kwok, D., Wang, J., Li, M., Mourier, T., Gavriiliuc, S., Greenberg, M., Morrissy, A. S., Sycuro, L., Yang, G., Jeffares, D., and Long, Q. (2020). De novo reconstruction of microbial haplotypes by integrating statistical and physical linkage. *bioRxiv preprint 014704*; doi: <https://doi.org/10.1101/2020.03.29.014704>, page 2020.03.29.014704.
- [Castro et al., 2019] Castro, J. P., Yancoskie, M. N., Marchini, M., Belohlavy, S., Hiramatsu, L., Kučka, M., Beluch, W. H., Naumann, R., Skuplik, I., Cobb, J., Barton, N. H., Rolian, C., and Chan, Y. F. (2019). An integrative genomic analysis of the Longshanks selection experiment for longer limbs in mice. *eLife*, 8:e42014.
- [Diamantaras and Chassioti, 2000] Diamantaras, K. I. and Chassioti, E. (2000). Blind separation of  $n$  binary sources from one observation: A deterministic approach. In *International Workshop on Independent Component Analysis and Blind Signal Separation*, pages 93–98, Helsinki.
- [Efron, 1979] Efron, B. (1979). Bootstrap Methods: Another Look at the Jackknife. *The Annals of Statistics*, 7(1):1–26.
- [Gavish and Donoho, 2014] Gavish, M. and Donoho, D. L. (2014). The Optimal Hard Threshold for Singular Values is  $4/\sqrt{3}$ . *IEEE Transactions on Information Theory*, 60(8):5040–5053.
- [Griffin et al., 2017] Griffin, P. C., Hangartner, S. B., Fournier-Level, A., and Hoffmann, A. A. (2017). Genomic trajectories to desiccation resistance: Convergence and divergence among replicate selected *Drosophila* lines. *Genetics*, 205(2):871–890.
- [Haller and Messer, 2019] Haller, B. C. and Messer, P. W. (2019). SLiM 3: Forward Genetic Simulations Beyond the Wright-Fisher Model. *Molecular Biology and Evolution*, 36(3):632–637.
- [Homer, 2010] Homer, N. (2010). Dwgsim: whole genome simulator for next-generation sequencing. *GitHub repository*.
- [Jónás et al., 2016] Jónás, A., Taus, T., Kosiol, C., Schlötterer, C., and Futschik, A. (2016). Estimating the effective population size from temporal allele frequency changes in experimental evolution. *Genetics*, 204(2):723–735.
- [Kofler et al., 2011] Kofler, R., Pandey, R. V., and Schlötterer, C. (2011). PoPoolation2: Identifying differentiation between populations using sequencing of pooled DNA samples (Pool-Seq). *Bioinformatics*, 27(24):3435–3436.

- 497 [Kraaijeveld and Godfray, 2008] Kraaijeveld, A. R. and Godfray, H. C. (2008). Selection for  
498 resistance to a fungal pathogen in *Drosophila melanogaster*. *Heredity*, 100(4):400–406.
- 499 [MacKay et al., 2012] MacKay, T. F., Richards, S., Stone, E. A., Barbadilla, A., Ayroles, J. F.,  
500 Zhu, D., Casillas, S., Han, Y., Magwire, M. M., Cridland, J. M., Richardson, M. F., Anholt,  
501 R. R., Barrón, M., Bess, C., Blankenburg, K. P., Carbone, M. A., Castellano, D., Chaboub,  
502 L., Duncan, L., Harris, Z., Javaid, M., Jayaseelan, J. C., Jhangiani, S. N., Jordan, K. W.,  
503 Lara, F., Lawrence, F., Lee, S. L., Librado, P., Linheiro, R. S., Lyman, R. F., MacKey,  
504 A. J., Munidasa, M., Muzny, D. M., Nazareth, L., Newsham, I., Perales, L., Pu, L. L., Qu,  
505 C., Ràmia, M., Reid, J. G., Rollmann, S. M., Rozas, J., Saada, N., Turlapati, L., Worley,  
506 K. C., Wu, Y. Q., Yamamoto, A., Zhu, Y., Bergman, C. M., Thornton, K. R., Mittelman,  
507 D., and Gibbs, R. A. (2012). The *Drosophila melanogaster* Genetic Reference Panel. *Nature*,  
508 482(7384):173–178.
- 509 [Noble et al., 2019] Noble, L. M., Rockman, M. V., and Teotónio, H. (2019). Gene-level quan-  
510 titative trait mapping in an expanded multiparent experimental evolution panel. *bioRxiv*  
511 *preprint 589432*; doi: <https://doi.org/10.1101/589432>.
- 512 [Schlötterer et al., 2014] Schlötterer, C., Tobler, R., Kofler, R., and Nolte, V. (2014). Sequenc-  
513 ing pools of individuals — mining genome-wide polymorphism data without big funding.  
514 *Nature Reviews Genetics*, 15(11):749–763.
- 515 [Spitzer et al., 2020] Spitzer, K., Pelizzola, M., and Futschik, A. (2020). Modifying the Chi-  
516 square and the CMH test for population genetic inference: Adapting to overdispersion. *The*  
517 *Annals of Applied Statistics*, 14(1):202–220.
- 518 [Vlachos and Kofler, 2018] Vlachos, C. and Kofler, R. (2018). MimicrEE2: Genome-wide for-  
519 ward simulations of Evolve and Resequencing studies. *PLoS Computational Biology*, 14(8).
- 520 [Waples, 1989] Waples, R. S. (1989). A generalized approach for estimating effective population  
521 size from temporal changes in allele frequency. *Genetics*, 121:379–391.
- 522 [Weber, 1996] Weber, K. E. (1996). Large genetic change at small fitness cost in large popula-  
523 tions of *Drosophila melanogaster* selected for wind tunnel flight: Rethinking fitness surfaces.  
524 *Genetics*, 144(1):205–213.
- 525 [Zanini et al., 2015] Zanini, F., Brodin, J., Thebo, L., Lanz, C., Bratt, G., Albert, J., and  
526 Neher, R. A. (2015). Population genomics of inpatient HIV-1 evolution. *eLife*, 4:e11282.
